# Supplementary material for: Effects of High-Deductible Health Plans on Enrollees With Mental Health Conditions With and Without Substance Use Disorders
Source: Atypon-hosted journal article supplement (doi:10.1176/appi.ps.202000914), 2021-09-30
Supplement: appi.ps.202000914.ds001.pdf [file appi.ps.202000914.ds001.pdf]

Appendices

**Table of Contents**

*A1: Analytic Sample Detailed Steps ..... 2*

*A2: Outcome Measures ..... 9*

*A3: Sample Characteristics ..... 13*

*A4: Full Model Results and Estimates for Figures 1-4 ..... 19*

*A5: Sensitivity Analyses ..... 26*

*A6: Pre-Period Trends Evaluation and Event Study Models ..... 29*

## A1: Analytic Sample Detailed Steps

Exhibit A1.1: Data processing steps and associated enrollee-year counts

| <u>Data Process</u>                                                                          | <u>Person Years</u> |
|----------------------------------------------------------------------------------------------|---------------------|
| All Enrollees, 2007-2017                                                                     | 278,342,299         |
| Require Medical, Pharmacy, and Behavioral Health Coverage                                    | 128,559,343         |
| Exclude Enrollees with Medicare Advantage or Medicare is Primary Payer                       | 120,339,003         |
| Require Fully Populated Medical and Pharmacy Deductible Data                                 | 108,952,938         |
| Require 11 Month Continuous Enrollment within a Person-Year                                  | 68,690,019          |
| Require Some Static Attributes within a Person-Year (firm, gender, year of birth, family ID) | 68,522,315          |
| Require Medical and Pharmacy Deductibles to Equal One Another When Shared                    | 68,255,606          |
| Require Enrollee Age to be Between 12 and 64                                                 | 56,415,790          |
| Select 1 Continuous Span of Data From Each Firm Uninterrupted By Large Changes in Firm Size  | 54,502,157          |
| Characterize Firm-Level HDHP Enrollment Trends and Identify Treatment and Comparison Firms   | 28,717,236          |
| → Enrollment Increase From $\leq 5\%$ to $> 5\%$ (Treatment Firm)                            | 14,531,870          |
| → All Years 0% Enrollment (Comparison Firms)                                                 | 14,185,366          |
| → All Years 100% Enrollment                                                                  | 7,791,702           |
| → All Years $\leq 5\%$ Enrollment (& not all 0%)                                             | 2,019,173           |
| → All Years $> 5\%$ Enrollment (& not all 100%)                                              | 11,449,970          |
| → Enrollment Crosses 5% Threshold Multiple Times                                             | 910,989             |
| → Enrollment Decrease From $> 5\%$ to $\leq 5\%$                                             | 319,664             |

To build our analytic dataset, we first start with plan-side data and clean the appropriate tables to ensure that a single plan is associated with a single deductible level and that there are no overlaps when plans are identified in the same way. We assign firms firm-specific date windows that define their year, driven by the modal start dates of the plans the firm offers. We join individuals to the clean

deductible information and ensure that individuals are associated with a single firm and deductible level for at least 330 days within their firm's year. We do not allow firms to have large year over year changes in enrollment.

We assign treatment status based on the percentage of a firm's enrollees that are enrolled in a high deductible health plan (HDHP). Firms with at least 2 continuous years of data, where the % enrolled in an HDHP goes from below this enrollment threshold to above this enrollment threshold exactly once are considered to be treatment firms. Firms that have no HDHP enrollees in all of its years of data are considered comparison firms. The detailed steps are laid out below.

We start with plan level detail and limit plans to only those that have valid deductible information. We manipulate this data so that plans do not overlap and are unique.

There are initially 741,181 plans. We remove those that don't have valid individual deductible information or have individual deductibles greater than family deductibles when the family deductible is nonzero. Duplicates are removed and plans that have overlapping active dates are collapsed into one. This leaves 562,383 unique plans.

There are initially 5,925,224 unique firm-plans. We remove duplicates, collapse overlapping records, trim dates, and ensure that firm-plans are only offered during a firm's time that it was a customer of the health insurer. These steps leave 5,003,529 firm-plans.

Based on these firm-plans that fit within their firm's active dates, we calculate each firm's modal month that its associated plans start on. Ties result in the earlier month being the mode. Plans can be any length of time, are not weighted by their plan size and the date used is the administrative start date within the firm-plan record (not enrollee start dates). The first of this month is used to drive a 'firm-year' for each year in the data. 67% of resulting enrollee-years are associated with firm-years that start in January and 6.9% are associated with firm years that start July (other months range from 2% to 4% of enrollee-years). Calendar years are defined based on the year in which the firm offered the plan.

We then join plan-level detail with firm-plans and ensure that plan-level detail fits appropriately within firm-plan records. We then join individual member records for individuals that are associated with firm-plans offered at the firm. Upon joining individual member records, we then merge in associated pharmacy plan deductible level. At this stage, we have a single pharmacy and single medical deductible for each individual.

There are 110M enrollee-years that are associated with plans that have a valid deductible, are non-Medicare primary commercial plan with medical, pharmacy, and mental health coverage from 2007 through 2017. Of these, 69M have continuous deductible levels that

span 330 days or longer within a firm-year. 65M of these enrollee-years have full years of continuous enrollment and deductible level within a firm-year. Gaps in enrollment within a calendar year are not allowed.

We ensure that individuals are only associated with a single firm in a year, have a single gender associated with them in a year, have a single year of birth resulting in a non-negative age, and are associated with a single family ID within a year. We also ensure that when individuals are enrolled in medical and pharmacy coverage that have a shared deductible, they have the same deductible listed. We allow for individuals to be associated with different firms in different years, meaning individuals may potentially experience high deductible plans with multiple firms. This leaves 68,255,606 enrollee-years and 23,916,969 unique enrollees.

These enrollee-years are associated with 373,040 firms and 1,036,540 firm-years. We limit the firms to include only enrollees older than 11 and younger than 64 years of age. When there are gaps in the time that the firm had plans in this dataset, we select the span in which the firm (1) has the greatest number of enrollee-years and (2) is the longest length. When firms have enrollment increases or decreases of greater than 50% from one year to the next, we keep the (1) largest and (2) longest span uninterrupted by these large changes. Larger changes in firm sizes may indicate a large change in the composition of the observed enrollees, perhaps due to mergers, large layoffs, or the movement of enrollees to a health plan of an insurer not observed in the data. This keeps 857,097 firm-years associated with 369,239 firms and 51,216,200 enrollee-years associated with 19,168,554 enrollees.

In sensitivity analyses, we vary the firm size change maximum to 25% and 75%. Reducing the firm size change maximum to 25% results in 747,902 firm-years associated with 369,239 firms and 47,475,970 enrollee-years associated with 18,617,962 enrollees. Increasing the firm size change maximum to 75% results in 891,454 firm-years associated with 369,239 firms and 52,410,483 enrollee-years associated with 19,373,139 enrollees. The average firm declines in size 3.6% from the year prior to HDHP offer to the year following HDHP offer.

We define an individual's total deductible level as the sum of their in-network medical and pharmacy deductible when the deductibles are not shared or if they are shared, their single deductible listed. In all cases where it is unknown whether the medical and pharmacy deductibles are shared, the pharmacy deductible is \$0 so summing and taking the medical deductible is the same amount. Thus, we keep these records and assign their total as their medical deductible. Plans having individual deductibles greater than the IRS threshold (2007-2008: \$1,100; 2009: \$1,150; 2010-2012: \$1,200; 2013-2014: \$1,250; 2015-2017: \$1,300) were considered an HDHP.

The percentage of enrollees within a firm-year that are enrolled in an HDHP (i.e., take-up) is used to assign firm-level treatment status. We characterize the following types of firms based on their take-up across calendar years in relation to a 5% enrollment threshold.

- Never Take Up: All of the firm’s years are 0% take-up (Even if just a single year)
- All Full Take-Up: All of the firm’s years are 100% take-up (Even if just a single year)
- Low Take-Up: All of the firm’s years are  $\leq 5\%$  take-up but is not a Never Take-Up Firm
- Constant Take-Up: All of the firm’s years are  $> 5\%$  take-up but is not an All Full Take-Up Firm
- Unstable Take-Up: Take-up crossed the 5% threshold more than one time across all of the firm’s years
- Reverse Take-Up: Take-up crosses the 5% threshold once, from  $> 5\%$  to  $\leq 5\%$
- Positive Take-Up: Take-up crosses the 5% threshold once, from  $\leq 5\%$  to  $> 5\%$

Positive Take-Up firms are HDHP treatment firms. Never Take-Up firms are comparison firms. Firms falling into other categories are dropped. Exhibit A1-2 displays the mean annual deductible before and after a HDHP offer among treatment and comparison firms. The year of HDHP offer results in a higher mean deductible at treatment firms, driven in large part by enrollees of the HDHPs. Enrollees of the non-HDHP plans at these firms have similar mean deductibles to those at comparison firms.

Exhibit A1.2: Deductible levels over time in relation to HDHP offer year.

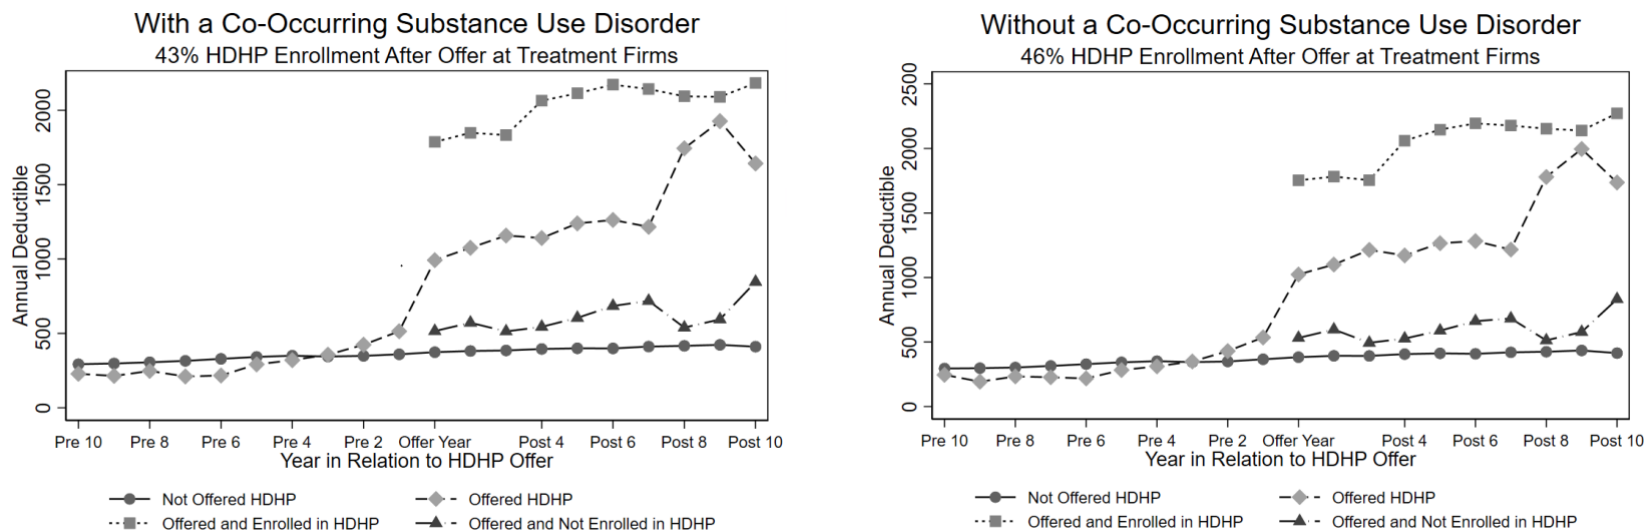

The exhibit displays mean in-network individual deductible levels for the treatment (offered HDHP) and comparison group (not offered HDHP) for enrollees with mental health conditions with and without a co-occurring substance use disorder. Comparison group means are calculated using the average of comparison group characteristics across calendar years and weighted by how often those calendar years appear in the treatment sample is that year relative to HDHP offer.

A 5% enrollment threshold results in 383,140 firm-years associated with 151,300 firms and 28,717,236 enrollee-years associated with 10,095,311 enrollees.

In sensitivity analyses we vary the HDHP enrollment threshold to 3% and 20%. Reducing the HDHP enrollment threshold to 3% results in 383,447 firm-years associated with 151,295 firms and 28,433,966 person-years associated with 10,024,929 people. Increasing the HDHP enrollment threshold to 20% results in 379,810 firm-years associated with 150,684 firms and 21,384,087 person-years associated with 8,130,568 people.

When increasing enrollment thresholds above 5%, we also require that firms offering an HDHP have <5% HDHP enrollment in all years prior to crossing the threshold.

We implemented the following methodology to generate our sample of individuals with mental health conditions with and without a co-occurring substance use disorder: Enrollees who had a mental health condition and at least one substance use disorder diagnosis while observed at a treatment or comparison firm were included in the co-occurring substance use disorder sample beginning in the year in which they received their first diagnosis, whether it was a mental health or substance use disorder diagnosis, and remained in this sample for the duration of their time observed at a treatment or comparison firm. Enrollees with at least one claim with a mental health diagnosis and no claims with a substance use disorder diagnosis are included in the mental health condition without substance use disorder sample beginning in the year in which they first receive their mental health diagnosis and for all subsequent years observed at a treatment or comparison firm. Because a HDHP is likely to reduce the likelihood that an individual seeks mental health or substance use disorder care, we have implemented this sensitive selection criteria. Appendix exhibit A1-4 and A1-5 evaluate differences in the proportion of enrollees that enter the samples at treatment and comparison firms before and after the HDHP offer.

We included demographic, socioeconomic, and additional health status variables in our dataset. The enrollee's geography was defined at the 9-category Census division level. Enrollee race categories (Asian, Black, Hispanic, White, and Unknown) was obtained from the data supplier as an imputed value. Income level categories (<\$40K, >= \$40K and < \$75K, >= \$75K and < \$125K, >= \$125K and < \$200K, > \$200K, or missing) were obtained from the data supplier as an imputed variable. Education level (Less Than High School, Some College, Bachelor's Degree or More), based on the American Community Survey's reported median-level of education on the enrollee's census-block, was also obtained. Forty seven non-mental health and non-SUD comorbidities were also captured as binary indicators at the enrollee-year level using Chronic Condition Warehouse algorithms. Frequencies of these attributes and the full list of variables is found in Appendix 3.

Exhibit A1.3: Substance Use Disorder and Mental Health International Classification of Disease (ICD) 9 and ICD 10 Codes

|                              | ICD9                                                                                           | ICD10                                               |
|------------------------------|------------------------------------------------------------------------------------------------|-----------------------------------------------------|
| All Substance Use Disorders  | 291.*-292.*, 303.*-305.* [excluding 305.1 tobacco use disorder and 305.8 antidepressant abuse] | F10-F19.* [excluding F17.2x (tobacco use disorder)] |
| Alcohol Use Disorder         | 291.*, 303.*, 305.0*                                                                           | F10.1*-F10.3*                                       |
| Opioid Use Disorder          | 305.5*, 304.0*, 304.7*                                                                         | F11.1*-F11.3*                                       |
| All Mental Health Conditions | 295.*-302.*, 306.*-314.*                                                                       | F20.*-F69.*, F84.*, F90.*-F99.*                     |
| Bipolar Disorder             | 296.0*, 296.1*, 296.[4-9]*, 301.11, 301.13                                                     | F30.*, F31.*, F34.*                                 |
| PTSD                         | 309.81                                                                                         | F43.1*                                              |
| ADD/ADHD                     | 314*                                                                                           | F90.[0-2 8-9]*                                      |

Exhibit A1.4: Proportion of enrollees at treatment and comparison firms with mental health conditions before and after HDHP offer, stratified by presence of a co-occurring substance use disorder.

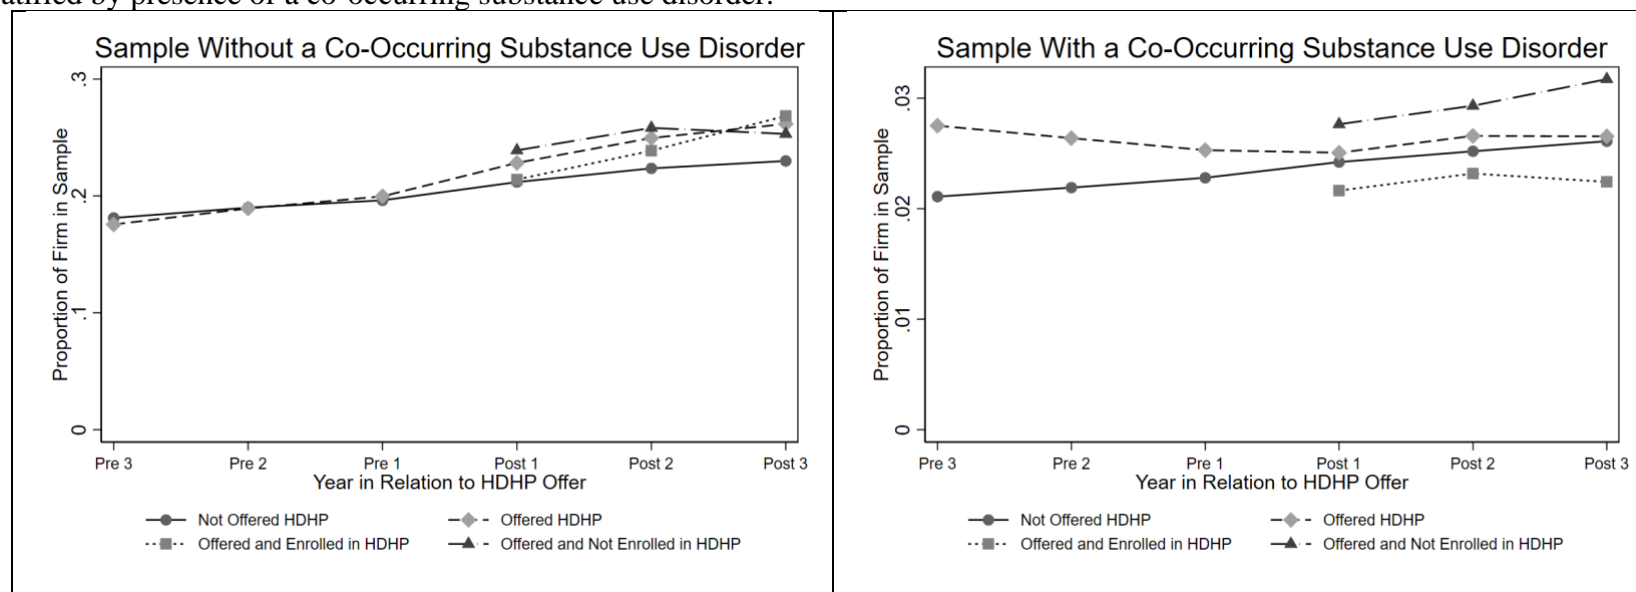

This exhibit displays the proportion of enrollees at treatment and comparison firms, before and after HDHP offer, that are included in the samples. We do not see large differences or differential trends in the proportion of enrollees that are included in the sample, indicating that we are likely mitigating the impact of a HDHP on the likelihood of any mental health or substance use disorder among treatment firms in the post period.

Exhibit A1.5: Standardized Mean Difference of proportion of enrollees with conditions in samples

|                                               | Pre 3   | Pre 2   | Pre 1   | Post 1  | Post 2  | Post 3  |
|-----------------------------------------------|---------|---------|---------|---------|---------|---------|
| Without a Co-Occurring Substance Use Disorder |         |         |         |         |         |         |
| N                                             | 494,173 | 609,922 | 750,138 | 809,582 | 709,015 | 611,783 |
| SMD                                           | 0.077   | 0.066   | 0.068   | 0.059   | 0.065   | 0.075   |
| With a Co-Occurring Substance Use Disorder    |         |         |         |         |         |         |
| N                                             | 48,901  | 59,800  | 72,987  | 76,807  | 67,948  | 58,774  |
| SMD                                           | 0.043   | 0.032   | 0.023   | 0.014   | 0.012   | 0.010   |

This exhibit displays a more formal evaluation of the proportion of enrollees at treatment and comparison firms, before and after HDHP offer, that are included in the samples. We measure the standardized mean difference of the proportion of enrollees found in each sample at treatment and comparison firms. All SMDs < 0.1.



A2: Outcome Measures

Exhibit A2.1: Substance Use Disorder and Mental Health International Classification of Disease (ICD) 9 and ICD 10 Codes

|                              | ICD9                                                                                           | ICD10                                               |
|------------------------------|------------------------------------------------------------------------------------------------|-----------------------------------------------------|
| All Substance Use Disorders  | 291.*-292.*, 303.*-305.* [excluding 305.1 tobacco use disorder and 305.8 antidepressant abuse] | F10-F19.* [excluding F17.2x (tobacco use disorder)] |
| Alcohol Use Disorder         | 291.*, 303.*, 305.0*                                                                           | F10.1*-F10.3*                                       |
| Opioid Use Disorder          | 305.5*, 304.0*, 304.7*                                                                         | F11.1*-F11.3*                                       |
| All Mental Health Conditions | 295.*-302.*, 306.*-314.*                                                                       | F20.*-F69.*, F84.*, F90.*-F99.*                     |
| Bipolar Disorder             | 296.0*, 296.1*, 296.[4-9]*, 301.11, 301.13                                                     | F30.*, F31.*, F34.*                                 |
| PTSD                         | 309.81                                                                                         | F43.1*                                              |
| ADD/ADHD                     | 314*                                                                                           | F90.[0-2][8-9]*                                     |

Exhibit A2.2: Outcome Definitions for Enrollees with Mental Health Conditions and a Co-Occurring Substance Use Disorder

|                                          |                                                                                                                                                                                                                                                                                                                                                                                                                                                                                                                        |
|------------------------------------------|------------------------------------------------------------------------------------------------------------------------------------------------------------------------------------------------------------------------------------------------------------------------------------------------------------------------------------------------------------------------------------------------------------------------------------------------------------------------------------------------------------------------|
| Inpatient Hospitalization Spending       | <p>We summed all physician and facility claims found within date ranges that contain a valid tax ID, having relevant revenue codes and AMA Place of Service Codes. This includes emergency department visits within one day of the beginning of an inpatient hospitalization.</p> <p>Mental health and SUD-related hospitalizations were identified as those hospitalization where at least 50% of facility claims within the inpatient stay had a SUD or mental health diagnosis in the first diagnosis position.</p> |
| Emergency Department Visit Spending      | <p>We summed all physician and facility claims with relevant place of service, revenue, or procedure codes. Emergency department visits occurring within one day of the beginning of an inpatient hospitalization were excluded.</p> <p>Mental health and SUD-related emergency department visits were identified by the presence of a SUD or mental health diagnosis code in the first diagnosis position.</p>                                                                                                        |
| Evaluation and Management Visit Spending | <p>We summed all physician and facility claims that include relevant procedure codes to identify evaluation and management claims. Relevant codes include non-physician evaluation and management services for mental health. These codes were included to include any potential price shopping to non-physician providers of mental health services.</p>                                                                                                                                                              |

|                                                       |                                                                                                                                                                                                                                                                                                                                                                                                                                                                                                                                                                                                                     |
|-------------------------------------------------------|---------------------------------------------------------------------------------------------------------------------------------------------------------------------------------------------------------------------------------------------------------------------------------------------------------------------------------------------------------------------------------------------------------------------------------------------------------------------------------------------------------------------------------------------------------------------------------------------------------------------|
|                                                       | Mental health and SUD-related evaluation and management services visits were identified by the presence of a SUD or mental health diagnosis code in the first diagnosis position.                                                                                                                                                                                                                                                                                                                                                                                                                                   |
| Psychotropic Medication Spending                      | We summed all physician and facility claims that included relevant medication administration procedure codes for the treatment of mental health conditions and all pharmacy claims that included relevant NDC codes for the treatment of mental health medications. Some medications for ADD/ADHD, bipolar disorder and PTSD required diagnosis codes for these conditions in a previous or contemporaneous year, as the medications can be used to treat some non-mental health conditions. Anti-EPs medications required that the enrollee be using an anti-psychotic medication during the contemporaneous year. |
| Substance Use Disorder Medication Spending            | We summed all physician and facility claims that included relevant medication administration procedure codes for the treatment of substance use disorder and all pharmacy claims that included relevant NDC codes for the treatment of substance use disorder. An alcohol use disorder diagnosis was required in the previous or contemporaneous year for Topiramate to count as a SUD medication. An opioid use disorder diagnosis was required in the previous or contemporaneous year for Clonidine to count as a SUD medication, as it can be used to treat the symptoms of withdrawal.                         |
| All Mental Health and Substance Use Disorder Spending | We summed all claims associated with mental health or SUD-related inpatient hospitalizations, all mental health and SUD medication claims, all screening, brief intervention and referral to treatment (SBIRT) claims, and all other claims that had a mental health or SUD primary diagnosis code, unless they were part of an inpatient hospitalization that was not designated as a mental health or SUD inpatient hospitalization.                                                                                                                                                                              |
| All Other Spending                                    | We summed all physician, facility, and pharmacy claims that were not captured in the mental health or SUD spending.                                                                                                                                                                                                                                                                                                                                                                                                                                                                                                 |
| All Other Medication Spending                         | We summed all pharmacy claims were not designated as SUD or mental health medications.                                                                                                                                                                                                                                                                                                                                                                                                                                                                                                                              |

Exhibit A2.3: Outcome Definitions for Enrollees with Mental Health Conditions without a Co-Occurring Substance Use Disorder

|                                                 |                                                                                                                                                                                                                                                                                                                                                                                                                                                                                                                                                                                                                |
|-------------------------------------------------|----------------------------------------------------------------------------------------------------------------------------------------------------------------------------------------------------------------------------------------------------------------------------------------------------------------------------------------------------------------------------------------------------------------------------------------------------------------------------------------------------------------------------------------------------------------------------------------------------------------|
| <p>Inpatient Hospitalization Spending</p>       | <p>We summed all physician and facility claims found within date ranges that contain a valid tax ID, having relevant revenue codes and AMA Place of Service Codes. This includes emergency department visits within one day of the beginning of an inpatient hospitalization.</p> <p>Mental health-related hospitalizations were identified as those hospitalization where at least 50% of facility claims within the inpatient stay had a mental health diagnosis in the first diagnosis position.</p>                                                                                                        |
| <p>Emergency Department Visit Spending</p>      | <p>We summed all physician and facility claims with relevant place of service, revenue, or procedure codes. Emergency department visits occurring within one day of the beginning of an inpatient hospitalization were excluded.</p> <p>Mental health-related emergency department visits were identified by the presence of a mental health diagnosis code in the first diagnosis position.</p>                                                                                                                                                                                                               |
| <p>Evaluation and Management Visit Spending</p> | <p>We summed all physician and facility claims that include relevant procedure codes to identify evaluation and management claims. Relevant codes include non-physician evaluation and management services for mental health. These codes were included to include any potential price shopping to non-physician providers of mental health services.</p> <p>Mental health evaluation and management visits were identified by the presence of a mental health diagnosis code in the first diagnosis position.</p>                                                                                             |
| <p>Psychotropic Medication Spending</p>         | <p>We summed all physician and facility claims that included relevant medication administration procedure codes for the treatment of mental health and all pharmacy claims that included relevant NDC codes for the treatment of mental health conditions. Some medications for ADD/ADHD, bipolar disorder and PTSD required diagnosis codes for these conditions in a previous or contemporaneous year, as the medications can be used to treat some non-mental health conditions. Anti-EPS medications required that the enrollee be using an anti-psychotic medication during the contemporaneous year.</p> |
| <p>All Mental Health Spending</p>               | <p>We summed all claims associated with mental health inpatient hospitalizations, all mental health medication claims, all screening, brief intervention and referral to treatment (SBIRT) claims, and all other claims that had a mental health disorder primary diagnosis code, unless they were part of an inpatient hospitalization that was not designated as a mental health-related inpatient hospitalization.</p>                                                                                                                                                                                      |

|                             |                                                                                                              |
|-----------------------------|--------------------------------------------------------------------------------------------------------------|
| All Other Spending          | We summed all physician, facility, and pharmacy claims that were not captured in the mental health spending. |
| All Other Pharmacy Spending | We summed all pharmacy claims were not designated as mental health medications.                              |

Exhibit A2.4: Outcome Definitions for Decomposed Price and Quantity Outcomes for Psychotropic Medications and Outpatient E&M Services

|                                                                                |                                                                                                                                                                                                                                                                                                                                                                                                                                                                                                                                                                                                                                                                                                                                                    |
|--------------------------------------------------------------------------------|----------------------------------------------------------------------------------------------------------------------------------------------------------------------------------------------------------------------------------------------------------------------------------------------------------------------------------------------------------------------------------------------------------------------------------------------------------------------------------------------------------------------------------------------------------------------------------------------------------------------------------------------------------------------------------------------------------------------------------------------------|
| Quantity of Days' Supply and Cost per Days' Supply of Psychotropic Medications | <p>These measure was calculated separately for the sample without a co-occurring SUD and for the sample with a co-occurring SUD.</p> <p>All pharmacy, physician, and facility claims captured in the Psychotropic Medication Spending categories were assigned a days' supply based on the value provided in the pharmacy claims or based on the relevant procedure codes. The quantity of total days supplied and the sum of all health plan and out-of-pocket spending for all psychotropic medications were summed within a year for each enrollee. The sum of health plan and out-of-pocket spending was divided by the quantity of total days supplied to calculate the cost per days' supply, which is used as our proxy for price.</p>      |
| Quantity of Visit Days and Cost per Visit Day for Outpatient E&M Services      | <p>These measures were calculated separately for mental health E&amp;M services and non-mental health E&amp;M services among the sample of enrollees without a co-occurring substance use disorder.</p> <p>All physician and facility claims in the mental health E&amp;M services and the non-mental health E&amp;M services categories had their health plan and out-of-pocket spending summed within the year. The count of the number of unique days with these claims within a year were assigned as the number of visit-days. The count of individual claims were not used to avoid multiple claims for a single visit. The summed spending within a year divided by the quantity of visit-days was calculated as the cost per visit-day</p> |

### A3: Sample Characteristics

#### Exhibit A3.1: Full Sample Characteristics and Standardized Mean Differences Among Enrollees with Mental Health Conditions with a Co-Occurring Substance Use Disorder Offered and Not Offered a High Deductible Health Plan

|                                    | Enrollees with Mental Health Conditions and a Co-Occurring Substance Use Disorder |                  |                   |                                     |                                      |                                       |
|------------------------------------|-----------------------------------------------------------------------------------|------------------|-------------------|-------------------------------------|--------------------------------------|---------------------------------------|
|                                    | Treatment Group                                                                   | Comparison Group | SMD Across Groups | Treatment Group Year Prior to Offer | Comparison Group Year Prior to Offer | SMD Across Groups Year Prior to Offer |
|                                    | N=332,722                                                                         | N=265,828        |                   | N=45,573                            | N=27,414                             |                                       |
| Age; Mean (SD)                     | 37.8 (14.4)                                                                       | 37.4 (14.3)      | 0.03              | 37.8 (14.3)                         | 37.2 (14.3)                          | 0.04                                  |
| Gender; N (%)                      |                                                                                   |                  |                   |                                     |                                      |                                       |
| Male                               | 177,858 (53.5%)                                                                   | 145,204 (54.6%)  | 0.023             | 24,260 (53.2%)                      | 14,994 (54.7%)                       | 0.028                                 |
| Female                             | > 154,853 (46.5%)                                                                 | 120,603 (45.4%)  | <0.1              | > 21,302 (>46.7%)                   | > 12,409 (>45.2%)                    | <0.1                                  |
| Unknown                            | < 11 (0%)                                                                         | 21 (0%)          | <0.1              | < 11 (<0.1%)                        | < 11 (<0.1%)                         | <0.1                                  |
| Family Size, Top Coded at 6; N (%) |                                                                                   |                  |                   |                                     |                                      |                                       |
| 1                                  | 82,048 (24.7%)                                                                    | 72,262 (27.2%)   | 0.058             | 11,581 (25.4%)                      | 7,527 (27.4%)                        | 0.044                                 |
| 2                                  | 72,488 (21.8%)                                                                    | 56,254 (21.2%)   | 0.015             | 9,989 (21.9%)                       | 5,814 (21.2%)                        | 0.018                                 |
| 3                                  | 61,134 (18.4%)                                                                    | 46,654 (17.6%)   | 0.021             | 8,344 (18.3%)                       | 4,797 (17.5%)                        | 0.020                                 |
| 4                                  | 69,145 (20.8%)                                                                    | 52,408 (19.7%)   | 0.027             | 9,401 (20.6%)                       | 5,417 (19.7%)                        | 0.022                                 |
| 5                                  | 32,173 (9.7%)                                                                     | 25,218 (9.5%)    | 0.006             | 4,261 (9.3%)                        | 2,557 (9.4%)                         | 0.001                                 |
| 6+                                 | 15,734 (4.7%)                                                                     | 13,032 (4.9%)    | 0.008             | 1,997 (4.4%)                        | 1,302 (4.8%)                         | 0.020                                 |
| Race; N (%)                        |                                                                                   |                  |                   |                                     |                                      |                                       |
| Asian                              | 4,788 (1.4%)                                                                      | 3,580 (1.3%)     | 0.008             | 587 (1.3%)                          | 363 (1.3%)                           | 0.004                                 |
| Black                              | 28,811 (8.7%)                                                                     | 20,852 (7.8%)    | 0.030             | 4,185 (9.2%)                        | 2,107 (7.7%)                         | 0.052                                 |
| Hispanic                           | 22,886 (6.9%)                                                                     | 21,014 (7.9%)    | 0.039             | 2,947 (6.5%)                        | 2,140 (7.8%)                         | 0.053                                 |
| White                              | 228,019 (68.5%)                                                                   | 181,492 (68.3%)  | 0.006             | 31,985 (70.2%)                      | 18,992 (69%)                         | 0.026                                 |
| Unknown                            | 48,218 (14.5%)                                                                    | 38,890 (14.6%)   | 0.004             | 5,869 (12.9%)                       | 3,812 (14.1%)                        | 0.037                                 |
| Census Division Geography; N (%)   |                                                                                   |                  |                   |                                     |                                      |                                       |
| New England                        | 12,353 (3.7%)                                                                     | 11,599 (4.4%)    | 0.033             | 1,701 (3.7%)                        | 1,272 (4.5%)                         | 0.040                                 |
| Mid Atlantic                       | 25,574 (7.7%)                                                                     | 23,251 (8.7%)    | 0.039             | 3,229 (7.1%)                        | 2,439 (8.8%)                         | 0.065                                 |
| East North Central                 | 47,812 (14.4%)                                                                    | 45,987 (17.3%)   | 0.081             | 6,578 (14.4%)                       | 4,773 (17.4%)                        | 0.083                                 |
| West North Central                 | 30,168 (9.1%)                                                                     | 17,674 (6.6%)    | 0.089             | 3,968 (8.7%)                        | 1,821 (6.7%)                         | 0.075                                 |
| South Atlantic                     | 102,593 (30.8%)                                                                   | 69,393 (26.1%)   | 0.105             | 14,911 (32.7%)                      | 7,171 (26.1%)                        | 0.144                                 |
| East South Central                 | 11,537 (3.5%)                                                                     | 12,805 (4.8%)    | 0.068             | > 1,621 (>3.5%)                     | > 1,302 (>4.7%)                      | <0.1                                  |
| West South Central                 | 43,037 (12.9%)                                                                    | 41,107 (15.5%)   | 0.073             | 5,683 (12.5%)                       | 4,250 (15.4%)                        | 0.087                                 |
| Mountain                           | 31,383 (9.4%)                                                                     | 26,336 (9.9%)    | 0.016             | 4,363 (9.6%)                        | 2,648 (9.8%)                         | 0.007                                 |
| Pacific                            | 28,225 (8.5%)                                                                     | 17,538 (6.6%)    | 0.071             | 3,497 (7.7%)                        | 1,716 (6.3%)                         | 0.052                                 |
| Other                              | < 11 (0%)                                                                         | 57 (0%)          | <0.1              | < 11 (<0.1%)                        | < 11 (<0.1%)                         | <0.1                                  |
| Unknown                            | > 29 (0%)                                                                         | 81 (0%)          | <0.1              | < 11 (<0.1%)                        | < 11 (<0.1%)                         | <0.1                                  |
| Census Block Education; N (%)      |                                                                                   |                  |                   |                                     |                                      |                                       |
| Less Than High School              | 2,608 (.8%)                                                                       | 2,498 (.9%)      | 0.017             | 443 (1%)                            | 296 (1%)                             | 0.006                                 |
| High School                        | 95,020 (28.6%)                                                                    | 82,329 (31%)     | 0.053             | 14,559 (31.9%)                      | 8,798 (31.8%)                        | 0.004                                 |
| Some College                       | 168,331 (50.6%)                                                                   | 129,632 (48.8%)  | 0.037             | 22,371 (49.1%)                      | 13,112 (48.2%)                       | 0.019                                 |
| Bachelors or more                  | 65,505 (19.7%)                                                                    | 50,176 (18.9%)   | 0.021             | 8,033 (17.6%)                       | 5,086 (18.6%)                        | 0.026                                 |
| Unknown                            | 1,258 (.4%)                                                                       | 1,193 (.4%)      | 0.011             | 167 (.4%)                           | 123 (.4%)                            | 0.013                                 |

**Enrollees with Mental Health Conditions and a Co-Occurring Substance Use Disorder**

|                                                          | Treatment Group | Comparison Group | SMD Across Groups | Treatment Group Year Prior to Offer | Comparison Group Year Prior to Offer | SMD Across Groups Year Prior to Offer |
|----------------------------------------------------------|-----------------|------------------|-------------------|-------------------------------------|--------------------------------------|---------------------------------------|
| <b>Annual Income; N (%)</b>                              |                 |                  |                   |                                     |                                      |                                       |
| < \$40K                                                  | 41,721 (12.5%)  | 33,612 (12.6%)   | 0.003             | 5,968 (13.1%)                       | 3,383 (12.3%)                        | 0.023                                 |
| >= \$40K and < \$75K                                     | 80,936 (24.3%)  | 64,480 (24.3%)   | 0.002             | 11,669 (25.6%)                      | 6,734 (24.5%)                        | 0.026                                 |
| >= \$75K and < \$125K                                    | 95,127 (28.6%)  | 74,263 (27.9%)   | 0.015             | 13,028 (28.6%)                      | 7,750 (28.1%)                        | 0.010                                 |
| >= \$125K and < \$200K                                   | 54,084 (16.3%)  | 40,582 (15.3%)   | 0.027             | 6,916 (15.2%)                       | 4,212 (15.3%)                        | 0.003                                 |
| > \$200K                                                 | 40,013 (12%)    | 29,968 (11.3%)   | 0.023             | 4,871 (10.7%)                       | 3,112 (11.3%)                        | 0.019                                 |
| Missing                                                  | 20,841 (6.3%)   | 22,923 (8.6%)    | 0.091             | 3,121 (6.8%)                        | 2,224 (8.5%)                         | 0.063                                 |
| <b>Non-Mental Health/Non-SUD Co-Occurring Conditions</b> |                 |                  |                   |                                     |                                      |                                       |
| Acquired Hypothyroidism                                  | 22,679 (6.8%)   | 17,461 (6.6%)    | 0.010             | 3,089 (6.8%)                        | 1,779 (6.5%)                         | 0.011                                 |
| Acute Myocardial Infarction                              | 894 (.3%)       | 856 (.3%)        | 0.010             | 138 (.3%)                           | 86 (.3%)                             | 0.002                                 |
| Alzheimer's Disease                                      | 124 (0%)        | 114 (0%)         | 0.003             | 23 (.1%)                            | 12 (0%)                              | 0.004                                 |
| Alzheimer's/Related Disorders/Dementia                   | 1,005 (.3%)     | 896 (.3%)        | 0.006             | 136 (.3%)                           | 78 (.3%)                             | 0.002                                 |
| Anemia                                                   | 22,639 (6.8%)   | 19,045 (7.2%)    | 0.014             | 3,453 (7.6%)                        | 1,989 (7.2%)                         | 0.013                                 |
| Asthma                                                   | 15,451 (4.6%)   | 13,150 (4.9%)    | 0.014             | 2,321 (5.1%)                        | 1,351 (4.9%)                         | 0.007                                 |
| Atrial Fibrillation                                      | 2,955 (.9%)     | 2,531 (1%)       | 0.007             | 415 (.9%)                           | 253 (.9%)                            | 0.002                                 |
| Benign Prostatic Hyperplasia                             | 2,324 (.7%)     | 2,184 (.8%)      | 0.014             | 323 (.7%)                           | 216 (.8%)                            | 0.010                                 |
| Cataract                                                 | 4,177 (1.3%)    | 3,420 (1.3%)     | 0.003             | 584 (1.3%)                          | 345 (1.3%)                           | 0.002                                 |
| Chronic Kidney Disease                                   | 8,302 (2.5%)    | 7,007 (2.6%)     | 0.009             | 1,141 (2.5%)                        | 647 (2.4%)                           | 0.006                                 |
| COPD and Bronchiectasis                                  | 9,902 (3%)      | 8,901 (3.3%)     | 0.021             | 1,532 (3.4%)                        | 921 (3.4%)                           | 0.000                                 |
| Diabetes                                                 | 19,430 (5.8%)   | 16,174 (6.1%)    | 0.010             | 2,811 (6.2%)                        | 1,634 (6%)                           | 0.008                                 |
| Glaucoma                                                 | 4,618 (1.4%)    | 3,904 (1.5%)     | 0.007             | 654 (1.4%)                          | 406 (1.5%)                           | 0.003                                 |
| Heart Failure                                            | 4,425 (1.3%)    | 4,029 (1.5%)     | 0.016             | 684 (1.5%)                          | 405 (1.5%)                           | 0.001                                 |
| Hip/Pelvic Fracture                                      | 482 (.1%)       | 439 (.2%)        | 0.005             | 84 (.2%)                            | 47 (.2%)                             | 0.004                                 |
| Hyperlipidemia                                           | 43,957 (13.2%)  | 36,321 (13.7%)   | 0.013             | 6,328 (13.9%)                       | 3,781 (13.7%)                        | 0.005                                 |
| Hypertension                                             | 65,278 (19.6%)  | 54,109 (20.4%)   | 0.018             | 9,573 (21%)                         | 5,542 (20.3%)                        | 0.019                                 |
| Ischemic Heart Disease                                   | 12,736 (3.8%)   | 11,946 (4.5%)    | 0.034             | 1,925 (4.2%)                        | 1,245 (4.5%)                         | 0.015                                 |
| Osteoporosis                                             | 445 (.1%)       | 270 (.1%)        | 0.009             | 83 (.2%)                            | 29 (.1%)                             | 0.019                                 |
| Rheumatoid Arthritis/Osteoarthritis)                     | 28,636 (8.6%)   | 23,652 (8.9%)    | 0.010             | 4,029 (8.8%)                        | 2,367 (8.7%)                         | 0.005                                 |
| Stroke/TIA                                               | 3,020 (.9%)     | 2,773 (1%)       | 0.014             | 478 (1%)                            | 292 (1.1%)                           | 0.001                                 |
| Breast Cancer                                            | 2,110 (.6%)     | 1,541 (.6%)      | 0.007             | 288 (.6%)                           | 156 (.6%)                            | 0.008                                 |
| Colorectal Cancer                                        | 635 (.2%)       | 546 (.2%)        | 0.003             | 98 (.2%)                            | 57 (.2%)                             | 0.002                                 |
| Prostate Cancer                                          | 197 (.1%)       | 193 (.1%)        | 0.005             | 30 (.1%)                            | 18 (.1%)                             | 0.001                                 |
| Lung Cancer                                              | 477 (.1%)       | 511 (.2%)        | 0.012             | 91 (.2%)                            | 53 (.2%)                             | 0.002                                 |
| Endometrial Cancer                                       | 71 (0%)         | 70 (0%)          | 0.003             | 12 (0%)                             | < 11 (0%)                            | <0.1                                  |
| Cerebral Palsy                                           | 144 (0%)        | 98 (0%)          | 0.003             | 25 (.1%)                            | < 11 (0%)                            | <0.1                                  |
| Cystic Fibrosis & Metabolic Developmental Disorders      | 809 (.2%)       | 687 (.3%)        | 0.003             | 112 (.2%)                           | 66 (.2%)                             | 0.001                                 |
| Epilepsy                                                 | 4,516 (1.4%)    | 3,797 (1.4%)     | 0.006             | 603 (1.3%)                          | 392 (1.4%)                           | 0.009                                 |
| HIV/AIDS                                                 | 1,256 (.4%)     | 1,010 (.4%)      | 0.000             | 152 (.3%)                           | 97 (.4%)                             | 0.004                                 |

**Enrollees with Mental Health Conditions and a Co-Occurring Substance Use Disorder**

|                                                           | Treatment Group | Comparison Group | SMD Across Groups | Treatment Group Year Prior to Offer | Comparison Group Year Prior to Offer | SMD Across Groups Year Prior to Offer |
|-----------------------------------------------------------|-----------------|------------------|-------------------|-------------------------------------|--------------------------------------|---------------------------------------|
| Intellectual Disabilities & Related Conditions            | 273 (.1%)       | 173 (.1%)        | 0.006             | 32 (.1%)                            | 18 (.1%)                             | 0.002                                 |
| Learning Disabilities                                     | 278 (.1%)       | 228 (.1%)        | 0.001             | 39 (.1%)                            | 22 (.1%)                             | 0.002                                 |
| Leukemias and Lymphomas                                   | 1,034 (.3%)     | 979 (.4%)        | 0.010             | 147 (.3%)                           | 99 (.4%)                             | 0.007                                 |
| Liver disease, cirrhosis & Non-Hepatitis liver conditions | 8,808 (2.6%)    | 8,300 (3.1%)     | 0.029             | 1,280 (2.8%)                        | 841 (3.1%)                           | 0.016                                 |
| Migraine/Chronic Headache                                 | 13,588 (4.1%)   | 10,516 (4%)      | 0.007             | 1,895 (4.2%)                        | 1,058 (3.9%)                         | 0.014                                 |
| Mobility Impairments                                      | 1,397 (.4%)     | 1,227 (.5%)      | 0.006             | 211 (.5%)                           | 122 (.4%)                            | 0.002                                 |
| Multiple Sclerosis and transverse myelitis                | 1,165 (.4%)     | 954 (.4%)        | 0.001             | 161 (.4%)                           | 98 (.4%)                             | 0.001                                 |
| Muscular Dystrophy                                        | 56 (0%)         | 44 (0%)          | 0.000             | 13 (0%)                             | < 11 (0%)                            | <0.1                                  |
| Obesity                                                   | 15,357 (4.6%)   | 12,201 (4.6%)    | 0.001             | 1,991 (4.4%)                        | 1,111 (4.2%)                         | 0.009                                 |
| Other Developmental Delays                                | 261 (.1%)       | 178 (.1%)        | 0.004             | 43 (.1%)                            | 18 (.1%)                             | 0.010                                 |
| Peripheral Vascular Disease                               | 2,173 (.7%)     | 2,025 (.8%)      | 0.013             | 350 (.8%)                           | 211 (.8%)                            | 0.001                                 |
| Pressure and Chronic Ulcers                               | 1,528 (.5%)     | 1,369 (.5%)      | 0.008             | 226 (.5%)                           | 139 (.5%)                            | 0.002                                 |
| Blindness and Visual Impairment                           | 83 (0%)         | 85 (0%)          | 0.004             | 14 (0%)                             | < 11 (0%)                            | <0.1                                  |
| Deafness and Hearing Impairment                           | 1,641 (.5%)     | 1,375 (.5%)      | 0.003             | 215 (.5%)                           | 137 (.5%)                            | 0.005                                 |
| Spina Bifida & Congenital Anomalies of the Nervous System | 244 (.1%)       | 245 (.1%)        | 0.007             | 35 (.1%)                            | 25 (.1%)                             | 0.005                                 |
| Spinal Cord Injury                                        | 523 (.2%)       | 448 (.2%)        | 0.003             | 66 (.1%)                            | 42 (.2%)                             | 0.003                                 |
| Viral Hepatitis                                           | 4,080 (1.2%)    | 3,269 (1.2%)     | 0.000             | 574 (1.3%)                          | 337 (1.2%)                           | 0.002                                 |

The exhibit displays characteristics for the treatment (offered HDHP) and comparison group (not offered HDHP) for all enrollee-years 2007-2017 (columns 2 & 3) and enrollee-years the year prior to HDHP Offer (columns 5 & 6) among the sample with mental health conditions and a co-occurring substance use disorder. Comparison group means are calculated using the average of comparison group characteristics across calendar years and weighted by how often those calendar years appear in the treatment sample. Comparison group means for the year prior to HDHP offer are constructed by weighting the average of comparison group characteristics across calendar years and by how often those calendar years appear in the treatment sample in the year preceding the HDHP offer year. Standardized mean differences are calculated for each characteristic using Hedges' g. Chronic conditions are derived from the Chronic Conditions Warehouse (CCW). Mental health and substance use disorder-related CCW conditions are excluded.

Exhibit A3.2: Full Sample Characteristics and Standardized Mean Differences Among Enrollees with Mental Health Conditions without a Co-Occurring Substance Use Disorder Offered and Not Offered a High Deductible Health Plan

| Enrollees with Mental Health Conditions without a Substance Use Disorder |                   |                   |                   |                                     |                                      |                                       |
|--------------------------------------------------------------------------|-------------------|-------------------|-------------------|-------------------------------------|--------------------------------------|---------------------------------------|
|                                                                          | Treatment Group   | Comparison Group  | SMD Across Groups | Treatment Group Year Prior to Offer | Comparison Group Year Prior to Offer | SMD Across Groups Year Prior to Offer |
|                                                                          | N=3,230,356       | N=2,798,222       |                   | N=458,182                           | N=291,955                            |                                       |
| Age; Mean (SD)                                                           | 39.9 (14.3)       | 39.4 (14.1)       | 0.04              | 39.9 (14.2)                         | 39.4 (14.0)                          | 0.04                                  |
| Gender; N (%)                                                            |                   |                   |                   |                                     |                                      |                                       |
| Male                                                                     | 1,229,353 (38.1%) | 1,096,395 (39.2%) | 0.023             | 169,649 (37%)                       | 113,649 (39.1%)                      | 0.042                                 |
| Female                                                                   | 2,000,867 (61.9%) | 1,701,547 (60.8%) | 0.023             | 288,518 (63%)                       | 178,275 (60.9%)                      | 0.042                                 |
| Unknown                                                                  | 136 (0%)          | 280 (0%)          | 0.007             | 15 (0%)                             | 30 (0%)                              | 0.009                                 |
| Family Size, Top Coded at 6; N (%)                                       |                   |                   |                   |                                     |                                      |                                       |
| 1                                                                        | 880,453 (27.3%)   | 821,764 (29.4%)   | 0.047             | 130,987 (28.6%)                     | 87,639 (29.7%)                       | 0.025                                 |
| 2                                                                        | 666,598 (20.6%)   | 572,079 (20.4%)   | 0.005             | 97,441 (21.3%)                      | 60,429 (20.6%)                       | 0.016                                 |
| 3                                                                        | 554,957 (17.2%)   | 452,939 (16.2%)   | 0.027             | 77,921 (17%)                        | 46,860 (16.1%)                       | 0.024                                 |
| 4                                                                        | 698,586 (21.6%)   | 572,071 (20.4%)   | 0.029             | 94,868 (20.7%)                      | 58,703 (20.3%)                       | 0.011                                 |
| 5                                                                        | 295,699 (9.2%)    | 257,442 (9.2%)    | 0.002             | 39,579 (8.6%)                       | 26,177 (9.1%)                        | 0.015                                 |
| 6+                                                                       | 134,063 (4.2%)    | 121,927 (4.4%)    | 0.010             | 17,386 (3.8%)                       | 12,147 (4.2%)                        | 0.023                                 |
| Race; N (%)                                                              |                   |                   |                   |                                     |                                      |                                       |
| Asian                                                                    | 84,535 (2.6%)     | 63,635 (2.3%)     | 0.022             | 10,347 (2.3%)                       | 6,481 (2.2%)                         | 0.001                                 |
| Black                                                                    | 312,601 (9.7%)    | 211,976 (7.6%)    | 0.075             | 47,001 (10.3%)                      | 21,965 (7.5%)                        | 0.094                                 |
| Hispanic                                                                 | 233,906 (7.2%)    | 257,460 (9.2%)    | 0.072             | 32,344 (7.1%)                       | 26,616 (9.1%)                        | 0.077                                 |
| White                                                                    | 2,172,355 (67.2%) | 1,870,891 (66.9%) | 0.008             | 315,281 (68.8%)                     | 198,495 (67.5%)                      | 0.027                                 |
| Unknown                                                                  | 426,959 (13.2%)   | 394,260 (14.1%)   | 0.025             | 53,209 (11.6%)                      | 38,398 (13.6%)                       | 0.059                                 |
| Census Division Geography; N (%)                                         |                   |                   |                   |                                     |                                      |                                       |
| New England                                                              | 97,572 (3%)       | 104,296 (3.7%)    | 0.039             | 13,599 (3%)                         | 11,627 (3.9%)                        | 0.050                                 |
| Mid Atlantic                                                             | 216,385 (6.7%)    | 253,950 (9.1%)    | 0.089             | 27,959 (6.1%)                       | 26,822 (9.2%)                        | 0.119                                 |
| East North Central                                                       | 441,934 (13.7%)   | 472,081 (16.9%)   | 0.089             | 62,581 (13.7%)                      | 49,756 (17.1%)                       | 0.096                                 |
| West North Central                                                       | 267,645 (8.3%)    | 207,348 (7.4%)    | 0.032             | 35,641 (7.8%)                       | 21,356 (7.3%)                        | 0.018                                 |
| South Atlantic                                                           | 1,167,528 (36.1%) | 744,419 (26.6%)   | 0.206             | 176,042 (38.4%)                     | 77,265 (26.5%)                       | 0.254                                 |
| East South Central                                                       | 105,331 (3.3%)    | 120,789 (4.3%)    | 0.056             | 15,476 (3.4%)                       | 12,395 (4.3%)                        | 0.047                                 |
| West South Central                                                       | 414,295 (12.8%)   | 474,663 (17%)     | 0.117             | 57,072 (12.5%)                      | 50,626 (17.2%)                       | 0.136                                 |
| Mountain                                                                 | 247,922 (7.7%)    | 232,399 (8.3%)    | 0.023             | 36,260 (7.9%)                       | 23,440 (8.1%)                        | 0.008                                 |
| Pacific                                                                  | 271,215 (8.4%)    | 186,628 (6.7%)    | 0.065             | 33,460 (7.3%)                       | 18,516 (6.4%)                        | 0.035                                 |
| Other                                                                    | 223 (0%)          | 964 (0%)          | 0.020             | 40 (0%)                             | 85 (0%)                              | 0.017                                 |
| Unknown                                                                  | 306 (0%)          | 685 (0%)          | 0.012             | 52 (0%)                             | 66 (0%)                              | 0.009                                 |
| Census Block Education; N (%)                                            |                   |                   |                   |                                     |                                      |                                       |
| Less Than High School                                                    | 25,294 (.8%)      | 29,845 (1.1%)     | 0.030             | 4,649 (1%)                          | 3,668 (1.2%)                         | 0.016                                 |
| High School                                                              | 937,315 (29%)     | 822,932 (29.4%)   | 0.009             | 152,006 (33.2%)                     | 89,675 (30.2%)                       | 0.063                                 |
| Some College                                                             | 1,586,015 (49.1%) | 1,357,954 (48.5%) | 0.011             | 216,508 (47.3%)                     | 138,765 (47.9%)                      | 0.013                                 |
| Bachelors or more                                                        | 669,498 (20.7%)   | 571,483 (20.4%)   | 0.007             | 83,413 (18.2%)                      | 58,139 (20.1%)                       | 0.048                                 |
| Unknown                                                                  | 12,234 (.4%)      | 16,008 (.6%)      | 0.028             | 1,606 (.4%)                         | 1,707 (.6%)                          | 0.032                                 |
| Annual Income; N (%)                                                     |                   |                   |                   |                                     |                                      |                                       |



| <b>Enrollees with Mental Health Conditions without a Substance Use Disorder</b> |                 |                  |                   |                                     |                                      |                                       |
|---------------------------------------------------------------------------------|-----------------|------------------|-------------------|-------------------------------------|--------------------------------------|---------------------------------------|
|                                                                                 | Treatment Group | Comparison Group | SMD Across Groups | Treatment Group Year Prior to Offer | Comparison Group Year Prior to Offer | SMD Across Groups Year Prior to Offer |
| < \$40K                                                                         | 377,870 (11.7%) | 301,397 (10.8%)  | 0.029             | 56,710 (12.4%)                      | 31,091 (10.7%)                       | 0.053                                 |
| >= \$40K and < \$75K                                                            | 750,457 (23.2%) | 625,618 (22.4%)  | 0.021             | 111,555 (24.3%)                     | 66,332 (22.7%)                       | 0.038                                 |
| >= \$75K and < \$125K                                                           | 943,785 (29.2%) | 792,779 (28.3%)  | 0.020             | 134,280 (29.3%)                     | 84,097 (28.8%)                       | 0.012                                 |
| >= \$125K and < \$200K                                                          | 568,571 (17.6%) | 470,441 (16.8%)  | 0.021             | 76,145 (16.6%)                      | 49,555 (17%)                         | 0.009                                 |
| > \$200K                                                                        | 415,337 (12.9%) | 347,801 (12.4%)  | 0.013             | 52,236 (11.4%)                      | 36,516 (12.5%)                       | 0.034                                 |
| Missing                                                                         | 174,336 (5.4%)  | 260,186 (9.3%)   | 0.151             | 27,256 (5.9%)                       | 24,364 (8.4%)                        | 0.097                                 |
| <b>Non-Mental Health/Non-SUD Co-Occurring Conditions</b>                        |                 |                  |                   |                                     |                                      |                                       |
| Acquired Hypothyroidism                                                         | 270,124 (8.4%)  | 225,414 (8.1%)   | 0.011             | 39,039 (8.5%)                       | 23,515 (8.1%)                        | 0.016                                 |
| Acute Myocardial Infarction                                                     | 3,851 (.1%)     | 3,737 (.1%)      | 0.004             | 659 (.1%)                           | 384 (.1%)                            | 0.004                                 |
| Alzheimer's Disease                                                             | 821 (0%)        | 738 (0%)         | 0.001             | 131 (0%)                            | 82 (0%)                              | 0.001                                 |
| Alzheimer's/Related Disorders/Dementia                                          | 3,467 (.1%)     | 3,173 (.1%)      | 0.002             | 529 (.1%)                           | 304 (.1%)                            | 0.003                                 |
| Anemia                                                                          | 160,308 (5%)    | 138,573 (5%)     | 0.000             | 24,526 (5.4%)                       | 14,693 (5%)                          | 0.016                                 |
| Asthma                                                                          | 111,986 (3.5%)  | 101,533 (3.6%)   | 0.009             | 17,063 (3.7%)                       | 10,615 (3.6%)                        | 0.005                                 |
| Atrial Fibrillation                                                             | 15,946 (.5%)    | 14,431 (.5%)     | 0.003             | 2,328 (.5%)                         | 1,484 (.5%)                          | 0.000                                 |
| Benign Prostatic Hyperplasia                                                    | 18,795 (.6%)    | 18,806 (.7%)     | 0.011             | 2,787 (.6%)                         | 1,950 (.7%)                          | 0.008                                 |
| Cataract                                                                        | 50,814 (1.6%)   | 43,648 (1.6%)    | 0.001             | 7,605 (1.7%)                        | 4,528 (1.6%)                         | 0.008                                 |
| Chronic Kidney Disease                                                          | 44,767 (1.4%)   | 37,914 (1.4%)    | 0.003             | 5,887 (1.3%)                        | 3,421 (1.2%)                         | 0.007                                 |
| COPD and Bronchiectasis                                                         | 39,119 (1.2%)   | 38,136 (1.4%)    | 0.014             | 6,432 (1.4%)                        | 4,051 (1.4%)                         | 0.003                                 |
| Diabetes                                                                        | 187,133 (5.8%)  | 157,924 (5.6%)   | 0.006             | 28,417 (6.2%)                       | 16,477 (5.6%)                        | 0.023                                 |
| Glaucoma                                                                        | 61,876 (1.9%)   | 56,043 (2%)      | 0.006             | 8,967 (2%)                          | 5,919 (2%)                           | 0.005                                 |
| Heart Failure                                                                   | 20,341 (.6%)    | 18,265 (.7%)     | 0.003             | 3,244 (.7%)                         | 1,918 (.7%)                          | 0.007                                 |
| Hip/Pelvic Fracture                                                             | 1,250 (0%)      | 1,131 (0%)       | 0.001             | 211 (0%)                            | 123 (0%)                             | 0.002                                 |
| Hyperlipidemia                                                                  | 433,941 (13.4%) | 383,515 (13.7%)  | 0.008             | 67,272 (14.7%)                      | 41,064 (13.9%)                       | 0.021                                 |
| Hypertension                                                                    | 510,914 (15.8%) | 438,791 (15.7%)  | 0.004             | 79,130 (17.3%)                      | 46,146 (15.7%)                       | 0.041                                 |
| Ischemic Heart Disease                                                          | 85,493 (2.6%)   | 85,529 (3.1%)    | 0.025             | 13,428 (2.9%)                       | 9,183 (3.1%)                         | 0.010                                 |
| Osteoporosis                                                                    | 3,829 (.1%)     | 3,128 (.1%)      | 0.002             | 636 (.1%)                           | 351 (.1%)                            | 0.005                                 |
| Rheumatoid Arthritis/Osteoarthritis)                                            | 153,609 (4.8%)  | 135,663 (4.8%)   | 0.004             | 22,891 (5%)                         | 13,799 (4.8%)                        | 0.011                                 |
| Stroke/TIA                                                                      | 15,253 (.5%)    | 14,507 (.5%)     | 0.007             | 2,427 (.5%)                         | 1,563 (.5%)                          | 0.000                                 |
| Breast Cancer                                                                   | 30,348 (.9%)    | 25,053 (.9%)     | 0.005             | 4,318 (.9%)                         | 2,604 (.9%)                          | 0.005                                 |
| Colorectal Cancer                                                               | 5,362 (.2%)     | 4,261 (.2%)      | 0.003             | 813 (.2%)                           | 431 (.1%)                            | 0.007                                 |
| Prostate Cancer                                                                 | 1,382 (0%)      | 1,401 (.1%)      | 0.003             | 210 (0%)                            | 147 (.1%)                            | 0.002                                 |
| Lung Cancer                                                                     | 2,728 (.1%)     | 2,591 (.1%)      | 0.003             | 446 (.1%)                           | 275 (.1%)                            | 0.001                                 |
| Endometrial Cancer                                                              | 782 (0%)        | 633 (0%)         | 0.001             | 110 (0%)                            | 61 (0%)                              | 0.002                                 |
| Cerebral Palsy                                                                  | 1,956 (.1%)     | 1,548 (.1%)      | 0.002             | 274 (.1%)                           | 160 (.1%)                            | 0.002                                 |
| <b>Cystic Fibrosis &amp; Metabolic</b>                                          |                 |                  |                   |                                     |                                      |                                       |
| Developmental Disorders                                                         | 5,937 (.2%)     | 5,081 (.2%)      | 0.001             | 844 (.2%)                           | 498 (.2%)                            | 0.002                                 |
| Epilepsy                                                                        | 17,132 (.5%)    | 14,778 (.5%)     | 0.000             | 2,573 (.6%)                         | 1,523 (.5%)                          | 0.005                                 |
| HIV/AIDS                                                                        | 4,339 (.1%)     | 3,649 (.1%)      | 0.001             | 463 (.1%)                           | 329 (.1%)                            | 0.005                                 |
| <b>Intellectual Disabilities &amp; Related Conditions</b>                       |                 |                  |                   |                                     |                                      |                                       |
|                                                                                 | 3,614 (.1%)     | 2,902 (.1%)      | 0.002             | 506 (.1%)                           | 287 (.1%)                            | 0.003                                 |

| <b>Enrollees with Mental Health Conditions without a Substance Use Disorder</b> |                 |                  |                   |                                     |                                      |                                       |
|---------------------------------------------------------------------------------|-----------------|------------------|-------------------|-------------------------------------|--------------------------------------|---------------------------------------|
|                                                                                 | Treatment Group | Comparison Group | SMD Across Groups | Treatment Group Year Prior to Offer | Comparison Group Year Prior to Offer | SMD Across Groups Year Prior to Offer |
| Learning Disabilities                                                           | 3,669 (.1%)     | 3,247 (.1%)      | 0.001             | 462 (.1%)                           | 292 (.1%)                            | 0.001                                 |
| Leukemias and Lymphomas                                                         | 8,209 (.3%)     | 7,179 (.3%)      | 0.000             | 1,194 (.3%)                         | 733 (.3%)                            | 0.002                                 |
| Liver disease, cirrhosis & Non-Hepatitis liver conditions                       | 27,341 (.8%)    | 25,388 (.9%)     | 0.007             | 3,954 (.9%)                         | 2,534 (.9%)                          | 0.001                                 |
| Migraine/Chronic Headache                                                       | 97,036 (3%)     | 86,589 (3.1%)    | 0.005             | 14,209 (3.1%)                       | 8,739 (3%)                           | 0.005                                 |
| Mobility Impairments                                                            | 6,059 (.2%)     | 5,419 (.2%)      | 0.001             | 940 (.2%)                           | 566 (.2%)                            | 0.003                                 |
| Multiple Sclerosis and transverse myelitis                                      | 10,944 (.3%)    | 9,961 (.4%)      | 0.003             | 1,577 (.3%)                         | 1,047 (.4%)                          | 0.002                                 |
| Muscular Dystrophy                                                              | 393 (0%)        | 327 (0%)         | 0.000             | 45 (0%)                             | 32 (0%)                              | 0.001                                 |
| Obesity                                                                         | 140,135 (4.3%)  | 119,467 (4.3%)   | 0.003             | 19,103 (4.2%)                       | 10,867 (3.9%)                        | 0.015                                 |
| Other Developmental Delays                                                      | 1,993 (.1%)     | 1,910 (.1%)      | 0.003             | 294 (.1%)                           | 186 (.1%)                            | 0.000                                 |
| Peripheral Vascular Disease                                                     | 10,560 (.3%)    | 10,469 (.4%)     | 0.008             | 1,691 (.4%)                         | 1,115 (.4%)                          | 0.001                                 |
| Pressure and Chronic Ulcers                                                     | 6,168 (.2%)     | 5,482 (.2%)      | 0.001             | 1,009 (.2%)                         | 576 (.2%)                            | 0.005                                 |
| Blindness and Visual Impairment                                                 | 489 (0%)        | 401 (0%)         | 0.001             | 65 (0%)                             | 41 (0%)                              | 0.000                                 |
| Deafness and Hearing Impairment                                                 | 15,865 (.5%)    | 14,342 (.5%)     | 0.003             | 2,239 (.5%)                         | 1,471 (.5%)                          | 0.003                                 |
| Spina Bifida & Congenital Anomalies of the Nervous System                       | 2,120 (.1%)     | 1,842 (.1%)      | 0.000             | 298 (.1%)                           | 189 (.1%)                            | 0.000                                 |
| Spinal Cord Injury                                                              | 1,271 (0%)      | 1,235 (0%)       | 0.002             | 174 (0%)                            | 121 (0%)                             | 0.002                                 |
| Viral Hepatitis                                                                 | 39,850 (1.2%)   | 34,189 (1.2%)    | 0.001             | 6,324 (1.4%)                        | 3,886 (1.3%)                         | 0.006                                 |

The exhibit displays characteristics for the treatment (offered HDHP) and comparison group (not offered HDHP) for all enrollee-years 2007-2017 (columns 2 & 3) and enrollee-years the year prior to HDHP Offer (columns 5 & 6) among the sample with mental health conditions without substance use disorder.

Comparison group means are calculated using the average of comparison group characteristics across calendar years and weighted by how often those calendar years appear in the treatment sample. Comparison group means for the year prior to HDHP offer are constructed by weighting the average of comparison group characteristics across calendar years and by how often those calendar years appear in the treatment sample in the year preceding the HDHP offer year.

Standardized mean differences are calculated for each characteristic using Hedges' g. Chronic conditions are derived from the Chronic Conditions Warehouse (CCW). Mental health and substance use disorder-related CCW conditions are excluded.

## A4: Full Model Results and Estimates for Figures 1-4

### Exhibit A4.1: Full model results for select outcomes

|                                              | Enrollees with Mental Health Conditions with a Co-Occurring Substance Use Disorder |                                                         |                                  |                                                               | Enrollees with Mental Health Conditions without a Co-Occurring Substance Use Disorder |                                 |
|----------------------------------------------|------------------------------------------------------------------------------------|---------------------------------------------------------|----------------------------------|---------------------------------------------------------------|---------------------------------------------------------------------------------------|---------------------------------|
|                                              | All Mental Health & Substance Use Disorder Spending                                | Spending on Medications to Treat Substance Use Disorder | Psychotropic Medication Spending | All Non-Mental Health and Non-Substance Use Disorder Spending | All Mental Health Spending                                                            | All Non-Mental Health Spending  |
| Sample Size                                  | 598,550                                                                            | 598,550                                                 | 598,550                          | 598,550                                                       | 6,028,578                                                                             | 6,028,578                       |
| Model F-Value                                | 36                                                                                 | 14                                                      | 64                               | 175                                                           | 274                                                                                   | 761                             |
| Model R-Squared                              | 0.08677                                                                            | 0.12649                                                 | 0.13118                          | 0.40421                                                       | 0.06301                                                                               | 0.32756                         |
| Pre Period Mean At Treatment Firms           | 3,012                                                                              | 120                                                     | 785                              | 11,426                                                        | 821                                                                                   | 6,908                           |
| HDHP Offer                                   | -39.29<br>(-182.61 to 104.04)                                                      | 2.42<br>(-7.46 to 12.31)                                | -35.49***<br>(-56.16 to -14.82)  | 126.83<br>(-183.87 to 437.53)                                 | -39.62***<br>(-59.25 to -19.98)                                                       | -128.11*<br>(-231.16 to -25.06) |
| Age                                          | -70.90***<br>(-77.34 to -64.46)                                                    | 1.39***<br>(1.13 to 1.66)                               | 1.26***<br>(0.53 to 1.99)        | -14.29***<br>(-22.74 to -5.84)                                | -11.72***<br>(-12.55 to -10.89)                                                       | 8.98***<br>(6.50 to 11.47)      |
| Race                                         |                                                                                    |                                                         |                                  |                                                               |                                                                                       |                                 |
| Asian                                        | Reference<br>301.44                                                                | Reference<br>5.35                                       | Reference<br>16.48               | Reference<br>-25.73                                           | Reference<br>161.37***                                                                | Reference<br>-41.63             |
| Black                                        | (-14.30 to 617.17)<br>64.41                                                        | (-21.15 to 31.86)<br>3.74                               | (-58.68 to 91.64)<br>-1.43       | (-1403.88 to 1352.43)<br>-10.76                               | (115.50 to 207.24)<br>84.33***                                                        | (-191.02 to 107.76)<br>59.62    |
| Hispanic                                     | (-265.43 to 394.26)<br>822.04***                                                   | (-18.98 to 26.45)<br>56.52***                           | (-81.69 to 78.82)<br>189.17***   | (-1225.65 to 1204.13)<br>955.40                               | (45.62 to 123.04)<br>290.69***                                                        | (-90.51 to 209.75)<br>626.70*** |
| White                                        | (508.66 to 1135.43)<br>601.38***                                                   | (37.13 to 75.90)<br>51.63***                            | (119.00 to 259.35)<br>143.61***  | (-280.51 to 2191.30)<br>920.97                                | (245.52 to 335.86)<br>250.51***                                                       | (486.31 to 767.10)<br>608.33*** |
| Unknown                                      | (277.80 to 924.96)                                                                 | (28.65 to 74.61)                                        | (69.44 to 217.79)                | (-290.56 to 2132.50)                                          | (207.12 to 293.90)                                                                    | (462.94 to 753.71)              |
| Annual Income                                |                                                                                    |                                                         |                                  |                                                               |                                                                                       |                                 |
| < \$40K                                      | Reference<br>-23.76                                                                | Reference<br>3.36                                       | Reference<br>53.76***            | Reference<br>116.06                                           | Reference<br>46.60***                                                                 | Reference<br>102.89**           |
| >= \$40K and < \$75K                         | (-127.43 to 79.92)<br>127.25                                                       | (-8.63 to 15.35)<br>0.15                                | (27.77 to 79.74)<br>114.14***    | (-219.08 to 451.21)<br>374.37                                 | (38.58 to 54.61)<br>78.08***                                                          | (24.75 to 181.02)<br>205.06***  |
| >= \$75K and < \$125K                        | (-2.12 to 256.62)<br>233.07**                                                      | (-12.45 to 12.74)<br>-2.07                              | (84.04 to 144.24)<br>152.94***   | (-10.50 to 759.24)<br>408.33*                                 | (70.36 to 85.81)<br>99.70***                                                          | (105.33 to 304.79)<br>331.56*** |
| >= \$125K and < \$200K                       | (87.06 to 379.08)<br>309.35***                                                     | (-17.17 to 13.04)<br>-18.16*                            | (114.87 to 191.00)<br>226.83***  | (11.69 to 804.97)<br>407.30                                   | (88.47 to 110.93)<br>139.32***                                                        | (211.29 to 451.82)<br>360.02*** |
| > \$200K                                     | (130.04 to 488.66)<br>543.79***                                                    | (-33.32 to -3.00)<br>6.66                               | (185.21 to 268.44)<br>64.54**    | (-80.62 to 895.21)<br>229.81                                  | (124.24 to 154.40)<br>75.35***                                                        | (240.93 to 479.11)<br>269.34*** |
| Missing                                      | (366.41 to 721.17)                                                                 | (-9.33 to 22.65)                                        | (25.98 to 103.10)                | (-224.81 to 684.44)                                           | (62.23 to 88.47)                                                                      | (124.33 to 414.36)              |
| Census Block Education Less Than High School | Reference<br>-129.86                                                               | Reference<br>18.67                                      | Reference<br>76.22**             | Reference<br>936.81                                           | Reference<br>21.79                                                                    | Reference<br>286.25***          |
| High School                                  | (-406.62 to 146.90)<br>239.08                                                      | (-6.95 to 44.29)<br>10.95                               | (25.87 to 126.56)<br>154.85***   | (-59.01 to 1932.63)<br>1202.10*                               | (-2.08 to 45.66)<br>97.26***                                                          | (122.18 to 450.32)<br>392.19*** |
| Some College                                 | (-37.73 to 515.90)<br>836.88***                                                    | (-16.76 to 38.66)<br>2.62                               | (102.18 to 207.52)<br>257.28***  | (218.18 to 2186.03)<br>1216.08*                               | (74.42 to 120.11)<br>276.53***                                                        | (225.97 to 558.41)<br>687.17*** |
| Bachelors or more                            | (543.94 to 1129.81)<br>-281.11                                                     | (-25.54 to 30.77)<br>-8.25                              | (197.24 to 317.33)<br>235.10*    | (219.68 to 2212.48)<br>884.69                                 | (249.38 to 303.67)<br>138.16***                                                       | (511.08 to 863.26)<br>161.56    |
| Unknown                                      | (-815.13 to 252.90)                                                                | (-57.26 to 40.75)                                       | (33.28 to 436.91)                | (-1315.38 to 3084.76)                                         | (90.63 to 185.70)                                                                     | (-159.52 to 482.64)             |

|                    | Enrollees with Mental Health Conditions with a Co-Occurring Substance Use Disorder |                                                         |                                    |                                                               | Enrollees with Mental Health Conditions without a Co-Occurring Substance Use Disorder |                                     |
|--------------------|------------------------------------------------------------------------------------|---------------------------------------------------------|------------------------------------|---------------------------------------------------------------|---------------------------------------------------------------------------------------|-------------------------------------|
|                    | All Mental Health & Substance Use Disorder Spending                                | Spending on Medications to Treat Substance Use Disorder | Psychotropic Medication Spending   | All Non-Mental Health and Non-Substance Use Disorder Spending | All Mental Health Spending                                                            | All Non-Mental Health Spending      |
| Gender             |                                                                                    |                                                         |                                    |                                                               |                                                                                       |                                     |
| Male               | Reference<br>284.14***                                                             | Reference<br>-36.89***                                  | Reference<br>219.83***             | Reference<br>933.04***                                        | Reference<br>43.04***                                                                 | Reference<br>697.18***              |
| Female             | (200.13 to 368.16)                                                                 | (-47.18 to -26.60)                                      | (202.17 to 237.49)                 | (718.86 to 1147.22)                                           | (33.50 to 52.59)                                                                      | (625.18 to 769.18)                  |
| Unknown            | -193.63<br>(-3350.47 to 2963.20)                                                   | -51.39<br>(-121.79 to 19.01)                            | -181.40<br>(-580.14 to 217.33)     | -4578.96*<br>(-8217.11 to -940.81)                            | 253.73**<br>(93.73 to 413.73)                                                         | 375.90<br>(-821.98 to 1573.77)      |
| Census Division    |                                                                                    |                                                         |                                    |                                                               |                                                                                       |                                     |
| Geography          |                                                                                    |                                                         |                                    |                                                               |                                                                                       |                                     |
| New England        | Reference<br>708.26***                                                             | Reference<br>18.54                                      | Reference<br>49.71                 | Reference<br>214.69                                           | Reference<br>136.29***                                                                | Reference<br>138.94                 |
| Mid Atlantic       | (315.61 to 1100.91)                                                                | (-10.78 to 47.86)                                       | (-29.12 to 128.55)                 | (-596.28 to 1025.66)                                          | (99.36 to 173.21)                                                                     | (-81.14 to 359.01)                  |
| East North Central | -670.54***<br>(-999.87 to -341.20)                                                 | -11.84<br>(-38.07 to 14.40)                             | 45.74<br>(-31.04 to 122.51)        | -511.68<br>(-1194.06 to 170.69)                               | -79.85***<br>(-120.24 to -39.46)                                                      | -123.94<br>(-340.86 to 92.98)       |
| West North Central | -470.75*<br>(-848.88 to -92.62)                                                    | -71.80***<br>(-98.53 to -45.07)                         | 98.53*<br>(23.48 to 173.59)        | -503.07<br>(-1348.24 to 342.10)                               | -62.87*<br>(-124.31 to -1.43)                                                         | -186.50<br>(-427.68 to 54.67)       |
| South Atlantic     | -448.28*<br>(-891.13 to -5.43)                                                     | -19.34<br>(-43.95 to 5.28)                              | 72.09<br>(-7.92 to 152.11)         | -276.14<br>(-938.04 to 385.75)                                | -114.71***<br>(-145.02 to -84.40)                                                     | -381.17***<br>(-568.95 to -193.39)  |
| East South Central | -752.31***<br>(-1166.15 to -338.47)                                                | 38.02<br>(-5.60 to 81.65)                               | 99.29*<br>(22.67 to 175.91)        | -2070.84***<br>(-2867.11 to -1274.57)                         | -127.21***<br>(-170.66 to -83.77)                                                     | -987.36***<br>(-1224.32 to -750.41) |
| West South Central | -445.32*<br>(-834.15 to -56.48)                                                    | 3.06<br>(-25.34 to 31.46)                               | 189.29***<br>(103.38 to 275.20)    | 1797.80***<br>(1077.70 to 2517.90)                            | -75.85***<br>(-115.74 to -35.95)                                                      | 442.94***<br>(202.18 to 683.70)     |
| Mountain           | -389.53*<br>(-713.12 to -65.95)                                                    | -32.04*<br>(-61.23 to -2.85)                            | -3.90<br>(-87.39 to 79.59)         | 655.75<br>(-161.47 to 1472.98)                                | -149.79***<br>(-187.39 to -112.18)                                                    | 3.20<br>(-231.64 to 238.04)         |
| Pacific            | 366.16<br>(-175.02 to 907.34)                                                      | -33.77**<br>(-58.58 to -8.97)                           | 12.42<br>(-64.32 to 89.17)         | 3033.90***<br>(2175.47 to 3892.34)                            | -11.92<br>(-61.84 to 38.00)                                                           | 1061.52***<br>(711.92 to 1411.12)   |
| Other              | -212.45<br>(-3912.31 to 3487.41)                                                   | -99.32<br>(-217.94 to 19.30)                            | -334.32<br>(-935.32 to 266.67)     | -1435.77<br>(-5937.07 to 3065.53)                             | -290.72<br>(-622.64 to 41.21)                                                         | 1019.76<br>(-3575.57 to 5615.09)    |
| Unknown            | -712.77<br>(-2465.23 to 1039.70)                                                   | 56.56<br>(-181.67 to 294.80)                            | -202.47<br>(-420.43 to 15.49)      | -386.89<br>(-3243.59 to 2469.82)                              | 72.46<br>(-156.31 to 301.22)                                                          | -607.38<br>(-1557.72 to 342.97)     |
| Calendar Year      |                                                                                    |                                                         |                                    |                                                               |                                                                                       |                                     |
| 2007               | Reference<br>-150.47***                                                            | Reference<br>9.40*                                      | Reference<br>-3.90                 | Reference<br>143.68                                           | Reference<br>-126.35***                                                               | Reference<br>98.46**                |
| 2008               | (-238.39 to -62.54)                                                                | (2.02 to 16.78)                                         | (-23.61 to 15.82)                  | (-205.95 to 493.31)                                           | (-143.25 to -109.46)                                                                  | (32.13 to 164.80)                   |
| 2009               | -191.23***<br>(-291.87 to -90.59)                                                  | 23.74***<br>(13.56 to 33.92)                            | -52.06***<br>(-76.48 to -27.64)    | 145.20<br>(-229.09 to 519.49)                                 | -219.82***<br>(-231.31 to -208.34)                                                    | 138.01***<br>(62.79 to 213.22)      |
| 2010               | 21.70<br>(-92.62 to 136.01)                                                        | 36.28***<br>(25.26 to 47.31)                            | -65.14***<br>(-93.58 to -36.71)    | 473.70*<br>(82.59 to 864.81)                                  | -260.65***<br>(-276.53 to -244.77)                                                    | 331.85***<br>(244.46 to 419.24)     |
| 2011               | 392.14***<br>(258.88 to 525.41)                                                    | 55.84***<br>(43.04 to 68.64)                            | -71.15***<br>(-101.98 to -40.33)   | 995.15***<br>(549.51 to 1440.78)                              | -284.28***<br>(-302.65 to -265.92)                                                    | 563.40***<br>(455.37 to 671.42)     |
| 2012               | 530.88***<br>(368.37 to 693.39)                                                    | 83.50***<br>(69.19 to 97.82)                            | -127.68***<br>(-159.27 to -96.08)  | 1257.45***<br>(794.39 to 1720.50)                             | -331.59***<br>(-350.27 to -312.91)                                                    | 739.02***<br>(614.89 to 863.16)     |
| 2013               | 677.60***<br>(503.35 to 851.85)                                                    | 88.75***<br>(70.90 to 106.59)                           | -183.34***<br>(-219.40 to -147.28) | 1860.61***<br>(1340.51 to 2380.71)                            | -352.82***<br>(-378.14 to -327.50)                                                    | 1082.90***<br>(930.33 to 1235.48)   |
| 2014               | 748.24***<br>(566.02 to 930.47)                                                    | 68.71***<br>(50.68 to 86.75)                            | -209.53***<br>(-249.48 to -169.58) | 2449.48***<br>(1885.49 to 3013.47)                            | -392.49***<br>(-415.92 to -369.06)                                                    | 1280.83***<br>(1122.14 to 1439.52)  |

|                                                         | Enrollees with Mental Health Conditions with a Co-Occurring Substance Use Disorder |                                                         |                                    | Enrollees with Mental Health Conditions without a Co-Occurring Substance Use Disorder |                                      |                                       |
|---------------------------------------------------------|------------------------------------------------------------------------------------|---------------------------------------------------------|------------------------------------|---------------------------------------------------------------------------------------|--------------------------------------|---------------------------------------|
|                                                         | All Mental Health & Substance Use Disorder Spending                                | Spending on Medications to Treat Substance Use Disorder | Psychotropic Medication Spending   | All Non-Mental Health and Non-Substance Use Disorder Spending                         | All Mental Health Spending           | All Non-Mental Health Spending        |
| 2015                                                    | 1064.46***<br>(875.21 to 1253.71)                                                  | 66.57***<br>(45.98 to 87.16)                            | -243.85***<br>(-284.84 to -202.86) | 2430.56***<br>(1812.32 to 3048.80)                                                    | -421.67***<br>(-445.09 to -398.24)   | 1164.63***<br>(994.45 to 1334.80)     |
| 2016                                                    | 1448.71***<br>(1184.67 to 1712.75)                                                 | 82.97***<br>(59.89 to 106.06)                           | -194.67***<br>(-236.68 to -152.65) | 2817.67***<br>(2157.62 to 3477.72)                                                    | -396.25***<br>(-419.49 to -373.01)   | 1792.56***<br>(1641.13 to 1944.00)    |
| 2017                                                    | 1718.47***<br>(1264.87 to 2172.07)                                                 | 102.06***<br>(78.62 to 125.49)                          | -140.31***<br>(-193.09 to -87.54)  | 4222.65***<br>(3432.37 to 5012.93)                                                    | -363.26***<br>(-391.88 to -334.65)   | 3017.54***<br>(2793.23 to 3241.84)    |
| Non-Mental Health/Non Substance Use Disorder Conditions |                                                                                    |                                                         |                                    |                                                                                       |                                      |                                       |
| Acquired                                                | 1125.49***                                                                         | 31.21***                                                | 402.91***                          | 2017.02***                                                                            | 211.01***                            | 1163.29***                            |
| Hypothyroidism                                          | (947.92 to 1303.06)                                                                | (16.85 to 45.58)                                        | (356.41 to 449.41)                 | (1509.57 to 2524.47)                                                                  | (199.18 to 222.83)                   | (1072.82 to 1253.77)                  |
| Acute Myocardial Infarction                             | -913.47**<br>(-1476.19 to -350.75)                                                 | 1.13<br>(-35.84 to 38.11)                               | -152.51***<br>(-237.89 to -67.12)  | 35149.15***<br>(31003.90 to 39294.40)                                                 | -188.78***<br>(-233.98 to -143.59)   | 35237.19***<br>(33969.83 to 36504.55) |
| Alzheimer's Disease                                     | -5341.32***<br>(-7682.34 to -3000.31)                                              | -88.30**<br>(-140.90 to -35.70)                         | -312.03<br>(-676.36 to 52.31)      | -9005.09<br>(-1.8e+04 to 418.65)                                                      | -1156.33***<br>(-1460.67 to -851.99) | -9390.27***<br>(-1.2e+04 to -6991.89) |
| Alzheimer's/Related Disorders/Dementia                  | 7633.93***<br>(5872.12 to 9395.73)                                                 | -1.49<br>(-37.20 to 34.21)                              | 686.71***<br>(499.48 to 873.94)    | 14742.20***<br>(10152.96 to 19331.44)                                                 | 2032.65***<br>(1800.32 to 2264.97)   | 13221.24***<br>(11048.21 to 15394.27) |
| Anemia                                                  | 880.00***<br>(740.70 to 1019.31)                                                   | 18.46**<br>(5.82 to 31.11)                              | 102.67***<br>(76.81 to 128.54)     | 22719.08***<br>(21652.71 to 23785.45)                                                 | 90.84***<br>(75.55 to 106.13)        | 12637.59***<br>(12109.05 to 13166.12) |
| Asthma                                                  | 2016.70***<br>(1774.57 to 2258.84)                                                 | -13.90*<br>(-24.68 to -3.12)                            | 278.99***<br>(233.95 to 324.03)    | 6810.18***<br>(6112.21 to 7508.15)                                                    | 257.83***<br>(237.82 to 277.85)      | 5678.32***<br>(5531.68 to 5824.97)    |
| Atrial Fibrillation                                     | -267.02<br>(-658.40 to 124.37)                                                     | -26.70<br>(-58.92 to 5.52)                              | -241.59***<br>(-301.45 to -181.73) | 16523.16***<br>(13944.31 to 19102.01)                                                 | -104.09***<br>(-130.22 to -77.96)    | 14062.77***<br>(13102.68 to 15022.86) |
| Benign Prostatic Hyperplasia                            | 302.83<br>(-78.44 to 684.10)                                                       | -21.64<br>(-55.39 to 12.11)                             | 80.99*<br>(16.63 to 145.35)        | 5303.81***<br>(3516.62 to 7091.00)                                                    | 58.28***<br>(36.41 to 80.14)         | 4750.99***<br>(4420.82 to 5081.16)    |
| Cataract                                                | -191.02<br>(-413.22 to 31.17)                                                      | -49.79***<br>(-67.69 to -31.90)                         | 19.24<br>(-37.07 to 75.54)         | 2460.61***<br>(1423.47 to 3497.75)                                                    | 123.73***<br>(105.94 to 141.51)      | 1621.39***<br>(1447.16 to 1795.63)    |
| Chronic Kidney Disease                                  | 278.16*<br>(45.90 to 510.43)                                                       | -13.51<br>(-28.69 to 1.66)                              | 47.42*<br>(7.55 to 87.30)          | 29532.80***<br>(27701.22 to 31364.39)                                                 | 53.41***<br>(30.41 to 76.41)         | 18978.90***<br>(18469.53 to 19488.28) |
| COPD and Bronchiectasis                                 | 763.58***<br>(517.65 to 1009.52)                                                   | -2.50<br>(-19.80 to 14.80)                              | 115.55***<br>(67.21 to 163.88)     | 10113.40***<br>(9081.06 to 11145.74)                                                  | 123.38***<br>(104.75 to 142.00)      | 8289.85***<br>(7919.13 to 8660.57)    |
| Diabetes                                                | -213.41**<br>(-370.55 to -56.27)                                                   | -11.54<br>(-25.37 to 2.29)                              | 90.38***<br>(50.43 to 130.32)      | 3649.51***<br>(2910.72 to 4388.29)                                                    | 64.79***<br>(52.44 to 77.15)         | 2182.75***<br>(2044.58 to 2320.92)    |
| Glaucoma                                                | -275.99**<br>(-462.74 to -89.25)                                                   | -43.26***<br>(-60.80 to -25.72)                         | 50.73<br>(-17.40 to 118.86)        | -480.80<br>(-1416.04 to 454.43)                                                       | 38.22***<br>(20.97 to 55.48)         | 502.48***<br>(374.13 to 630.83)       |
| Heart Failure                                           | -90.95<br>(-411.21 to 229.31)                                                      | -14.76<br>(-32.79 to 3.26)                              | -19.09<br>(-80.68 to 42.50)        | 22982.83***<br>(20530.85 to 25434.82)                                                 | 6.47<br>(-20.81 to 33.74)            | 18429.14***<br>(17483.29 to 19374.99) |
| Hip/Pelvic Fracture                                     | -144.50<br>(-1007.68 to 718.68)                                                    | -30.74<br>(-83.87 to 22.40)                             | -171.84***<br>(-268.75 to -74.92)  | 55762.31***<br>(48436.77 to 63087.84)                                                 | -76.43<br>(-169.34 to 16.48)         | 58823.65***<br>(55642.75 to 62004.54) |
| Hyperlipidemia                                          | -9.57<br>(-115.20 to 96.06)                                                        | -35.41***<br>(-44.83 to -25.99)                         | 123.54***<br>(100.20 to 146.87)    | -733.51***<br>(-1116.65 to -350.38)                                                   | 81.41***<br>(71.68 to 91.15)         | 214.72***<br>(147.51 to 281.93)       |
| Hypertension                                            | 1061.95***<br>(929.43 to 1194.48)                                                  | -8.74<br>(-17.81 to 0.34)                               | -18.78<br>(-39.63 to 2.06)         | 2790.38***<br>(2478.44 to 3102.33)                                                    | 29.72***<br>(23.27 to 36.16)         | 2247.42***<br>(2152.18 to 2342.66)    |
| Ischemic Heart Disease                                  | -117.63<br>(-270.25 to 35.00)                                                      | -22.64***<br>(-35.72 to -9.56)                          | -71.93***<br>(-106.62 to -37.25)   | 6825.89***<br>(6058.09 to 7593.69)                                                    | -8.04<br>(-20.75 to 4.67)            | 6180.56***<br>(5842.45 to 6518.67)    |

|                                                           | Enrollees with Mental Health Conditions with a Co-Occurring Substance Use Disorder |                                                         |                                  | Enrollees with Mental Health Conditions without a Co-Occurring Substance Use Disorder |                            |                                |
|-----------------------------------------------------------|------------------------------------------------------------------------------------|---------------------------------------------------------|----------------------------------|---------------------------------------------------------------------------------------|----------------------------|--------------------------------|
|                                                           | All Mental Health & Substance Use Disorder Spending                                | Spending on Medications to Treat Substance Use Disorder | Psychotropic Medication Spending | All Non-Mental Health and Non-Substance Use Disorder Spending                         | All Mental Health Spending | All Non-Mental Health Spending |
| Osteoporosis                                              | -523.01*                                                                           | -54.58*                                                 | 44.72                            | 6785.06*                                                                              | 224.27***                  | 3237.43***                     |
| Rheumatoid Arthritis/Osteoarthritis)                      | (-1023.45 to -22.58)                                                               | (-106.97 to -2.19)                                      | (-116.82 to 206.26)              | (862.09 to 12708.04)                                                                  | (135.45 to 313.09)         | (2373.07 to 4101.80)           |
| Stroke/TIA                                                | -181.83***                                                                         | 8.09                                                    | 231.51***                        | 13711.77***                                                                           | 240.88***                  | 10622.65***                    |
| Breast Cancer                                             | (-284.81 to -78.84)                                                                | (-3.82 to 20.01)                                        | (194.07 to 268.96)               | (12998.04 to 14425.50)                                                                | (229.65 to 252.11)         | (10396.63 to 10848.67)         |
| Colorectal Cancer                                         | -439.94*                                                                           | -19.00                                                  | -123.41***                       | 14205.28***                                                                           | 34.41                      | 11687.18***                    |
| Prostate Cancer                                           | (-815.07 to -64.81)                                                                | (-40.73 to 2.74)                                        | (-188.02 to -58.80)              | (11570.79 to 16839.77)                                                                | (-5.21 to 74.04)           | (11014.76 to 12359.59)         |
| Lung Cancer                                               | 52.11                                                                              | -12.44                                                  | 144.51*                          | 25008.40***                                                                           | 64.33***                   | 23367.85***                    |
| Endometrial Cancer                                        | (-305.12 to 409.34)                                                                | (-55.82 to 30.94)                                       | (21.97 to 267.06)                | (22000.16 to 28016.63)                                                                | (39.18 to 89.47)           | (22426.64 to 24309.07)         |
| Cerebral Palsy                                            | -960.81**                                                                          | -69.97***                                               | -139.59                          | 42355.45***                                                                           | -63.49*                    | 41503.91***                    |
| Cystic Fibrosis & Metabolic Disorders                     | (-1576.32 to -345.31)                                                              | (-103.50 to -36.43)                                     | (-283.98 to 4.81)                | (35051.36 to 49659.54)                                                                | (-114.97 to -12.02)        | (39549.36 to 43458.46)         |
| Epilepsy                                                  | 1126.36                                                                            | -77.19**                                                | -81.54                           | 22352.95***                                                                           | 12.24                      | 17028.82***                    |
| HIV/AIDS                                                  | (-576.99 to 2829.72)                                                               | (-127.13 to -27.24)                                     | (-268.10 to 105.01)              | (14554.34 to 30151.56)                                                                | (-90.52 to 115.00)         | (15259.21 to 18798.43)         |
| Intellectual Disabilities & Related Conditions            | -1412.51***                                                                        | -50.85                                                  | -114.58                          | 65464.88***                                                                           | -134.10***                 | 63254.48***                    |
| Learning Disabilities                                     | (-2016.43 to -808.59)                                                              | (-102.75 to 1.04)                                       | (-341.39 to 112.22)              | (53985.29 to 76944.47)                                                                | (-189.88 to -78.32)        | (60239.62 to 66269.35)         |
| Leukemias and Lymphomas                                   | 405.17                                                                             | 32.37                                                   | -60.72                           | 34867.97***                                                                           | -11.55                     | 26476.52***                    |
| Liver disease, cirrhosis & Non-Hepatitis liver conditions | (-1544.42 to 2354.77)                                                              | (-80.56 to 145.31)                                      | (-363.81 to 242.37)              | (18766.13 to 50969.82)                                                                | (-158.02 to 134.93)        | (23196.99 to 29756.05)         |
| Migraine/Chronic Headache                                 | -1755.53                                                                           | -87.75***                                               | 242.18                           | 5415.72                                                                               | -28.40                     | 12041.42***                    |
| Mobility Impairments                                      | (-3669.00 to 157.94)                                                               | (-122.74 to -52.75)                                     | (-307.20 to 791.57)              | (-5273.38 to 16104.81)                                                                | (-256.52 to 199.72)        | (8798.94 to 15283.90)          |
| Multiple Sclerosis and transverse myelitis                | 1666.00**                                                                          | 25.91                                                   | 113.33                           | 26272.17***                                                                           | 239.80***                  | 15181.75***                    |
| Muscular Dystrophy                                        | (654.20 to 2677.79)                                                                | (-22.37 to 74.18)                                       | (-15.18 to 241.84)               | (18565.17 to 33979.18)                                                                | (152.25 to 327.35)         | (12969.43 to 17394.06)         |
| Obesity                                                   | 4037.68***                                                                         | 40.66**                                                 | 356.68***                        | 13124.01***                                                                           | 681.55***                  | 13633.60***                    |
|                                                           | (3519.50 to 4555.87)                                                               | (11.12 to 70.20)                                        | (272.65 to 440.71)               | (11650.34 to 14597.69)                                                                | (620.17 to 742.94)         | (12928.19 to 14339.02)         |
|                                                           | 1194.50*                                                                           | -70.40***                                               | 11.69                            | 38971.24***                                                                           | 25.15                      | 42917.86***                    |
|                                                           | (273.35 to 2115.65)                                                                | (-102.52 to -38.28)                                     | (-103.00 to 126.38)              | (35255.18 to 42687.30)                                                                | (-43.77 to 94.06)          | (41084.55 to 44751.16)         |
|                                                           | 9690.73***                                                                         | -42.88                                                  | 1867.55***                       | 9584.74**                                                                             | 2310.16***                 | 7224.58***                     |
|                                                           | (6183.29 to 13198.17)                                                              | (-96.74 to 10.97)                                       | (954.31 to 2780.80)              | (2917.19 to 16252.30)                                                                 | (1985.14 to 2635.19)       | (5776.07 to 8673.09)           |
|                                                           | 5746.22***                                                                         | -52.87**                                                | 1016.74***                       | 1987.23                                                                               | 2181.41***                 | 1769.02***                     |
|                                                           | (3764.91 to 7727.53)                                                               | (-86.99 to -18.75)                                      | (698.20 to 1335.29)              | (-1900.11 to 5874.58)                                                                 | (1955.14 to 2407.68)       | (1044.18 to 2493.86)           |
|                                                           | -788.44***                                                                         | -23.30                                                  | -108.80                          | 62789.30***                                                                           | -20.28                     | 44534.57***                    |
|                                                           | (-1207.68 to -369.21)                                                              | (-64.46 to 17.87)                                       | (-218.53 to 0.93)                | (56719.57 to 68859.03)                                                                | (-63.37 to 22.81)          | (42846.41 to 46222.72)         |
|                                                           | 2390.20***                                                                         | -28.78***                                               | -190.61***                       | 21338.90***                                                                           | 44.50***                   | 20843.41***                    |
|                                                           | (2062.84 to 2717.56)                                                               | (-44.19 to -13.37)                                      | (-222.85 to -158.37)             | (19945.12 to 22732.67)                                                                | (22.07 to 66.93)           | (20099.24 to 21587.59)         |
|                                                           | 1531.62***                                                                         | 34.15***                                                | 411.58***                        | 9787.44***                                                                            | 336.75***                  | 4738.21***                     |
|                                                           | (1285.86 to 1777.37)                                                               | (20.12 to 48.19)                                        | (362.04 to 461.12)               | (8979.28 to 10595.60)                                                                 | (318.79 to 354.71)         | (4573.21 to 4903.20)           |
|                                                           | -1051.83***                                                                        | -37.98**                                                | -6.35                            | 48366.35***                                                                           | 5.90                       | 35685.37***                    |
|                                                           | (-1516.25 to -587.41)                                                              | (-63.00 to -12.96)                                      | (-120.11 to 107.41)              | (43685.94 to 53046.77)                                                                | (-83.01 to 94.81)          | (33055.06 to 38315.69)         |
|                                                           | 452.13                                                                             | -50.66**                                                | 454.04***                        | 38431.48***                                                                           | 442.28***                  | 36081.23***                    |
|                                                           | (-157.24 to 1061.49)                                                               | (-84.00 to -17.32)                                      | (284.31 to 623.76)               | (32285.89 to 44577.07)                                                                | (353.11 to 531.45)         | (33760.97 to 38401.48)         |
|                                                           | -246.88                                                                            | -51.28                                                  | 17.64                            | 17910.92**                                                                            | 472.20***                  | 15884.83***                    |
|                                                           | (-2192.02 to 1698.26)                                                              | (-145.46 to 42.91)                                      | (-449.31 to 484.60)              | (5288.32 to 30533.52)                                                                 | (146.52 to 797.88)         | (11209.99 to 20559.67)         |
|                                                           | 701.72***                                                                          | 2.04                                                    | 215.57***                        | 7612.05***                                                                            | 142.80***                  | 5194.38***                     |
|                                                           | (491.78 to 911.65)                                                                 | (-9.53 to 13.61)                                        | (179.00 to 252.14)               | (6787.67 to 8436.44)                                                                  | (125.39 to 160.22)         | (4996.41 to 5392.35)           |

|                                                           | Enrollees with Mental Health Conditions with a Co-Occurring Substance Use Disorder |                                                         |                                   | Enrollees with Mental Health Conditions without a Co-Occurring Substance Use Disorder |                                    |                                       |
|-----------------------------------------------------------|------------------------------------------------------------------------------------|---------------------------------------------------------|-----------------------------------|---------------------------------------------------------------------------------------|------------------------------------|---------------------------------------|
|                                                           | All Mental Health & Substance Use Disorder Spending                                | Spending on Medications to Treat Substance Use Disorder | Psychotropic Medication Spending  | All Non-Mental Health and Non-Substance Use Disorder Spending                         | All Mental Health Spending         | All Non-Mental Health Spending        |
| Other Developmental Delays                                | 6653.74***<br>(3372.15 to 9935.32)                                                 | -50.11*<br>(-89.32 to -10.90)                           | 823.39***<br>(475.59 to 1171.19)  | 587.57<br>(-3291.94 to 4467.09)                                                       | 2059.38***<br>(1836.74 to 2282.02) | 6454.68***<br>(5035.12 to 7874.24)    |
| Peripheral Vascular Disease                               | -657.29***<br>(-991.02 to -323.57)                                                 | 2.46<br>(-26.93 to 31.86)                               | -132.06***<br>(-193.00 to -71.13) | 15179.11***<br>(12712.08 to 17646.15)                                                 | -6.54<br>(-53.47 to 40.40)         | 11357.82***<br>(10655.04 to 12060.61) |
| Pressure and Chronic Ulcers                               | -302.82<br>(-818.37 to 212.73)                                                     | 36.29<br>(-26.11 to 98.68)                              | 95.76*<br>(3.54 to 187.98)        | 35767.26***<br>(31229.08 to 40305.44)                                                 | 64.10*<br>(14.57 to 113.63)        | 26952.11***<br>(25661.73 to 28242.49) |
| Blindness and Visual Impairment                           | 5442.91***<br>(2292.82 to 8593.00)                                                 | 138.20<br>(-41.24 to 317.64)                            | 197.47<br>(-167.63 to 562.57)     | 20836.50**<br>(5829.23 to 35843.78)                                                   | 216.48<br>(-56.64 to 489.60)       | 22845.76***<br>(17705.14 to 27986.39) |
| Deafness and Hearing Impairment                           | 676.15*<br>(136.27 to 1216.02)                                                     | -28.43*<br>(-56.60 to -0.25)                            | 137.81**<br>(41.02 to 234.61)     | 7360.79***<br>(5256.27 to 9465.31)                                                    | 204.31***<br>(171.85 to 236.77)    | 6267.18***<br>(5818.75 to 6715.61)    |
| Spina Bifida & Congenital Anomalies of the Nervous System | 930.00<br>(-1207.68 to 3067.69)                                                    | -53.73*<br>(-103.03 to -4.43)                           | 30.40<br>(-212.45 to 273.25)      | 31518.65***<br>(23092.86 to 39944.43)                                                 | 107.56<br>(-46.87 to 261.98)       | 19807.95***<br>(17212.27 to 22403.63) |
| Spinal Cord Injury                                        | -107.40<br>(-760.83 to 546.03)                                                     | -29.14<br>(-67.20 to 8.92)                              | -32.50<br>(-154.41 to 89.41)      | 61710.79***<br>(53808.85 to 69612.73)                                                 | -11.57<br>(-127.01 to 103.88)      | 48021.92***<br>(44637.39 to 51406.45) |
| Viral Hepatitis                                           | 2353.96***<br>(1692.78 to 3015.15)                                                 | 25.46*<br>(0.30 to 50.61)                               | 51.34<br>(-3.19 to 105.87)        | 6769.53***<br>(5202.72 to 8336.34)                                                    | 89.93***<br>(72.63 to 107.22)      | 2423.42***<br>(2135.16 to 2711.69)    |

The exhibit displays OLS model estimates and 95% confidence intervals for all non-mental mental and non-substance use disorder spending outcomes using main model specifications among the sample of enrollees with co-occurring substance use disorder and mental health. (\*\*\*) p < 0.001, \*\*p<0.01, \*p<0.05.)

#### A4.2: Coefficients for Main Independent Variable for All Regression Models in Figures 1 and 3

| Sample                                                                                | Spending Outcome                                                                  | Pre-Period Mean at Treatment Firms (\$) | Change in Spending Attributable to HDHP Offer (\$) | 95% Confidence Interval (\$) |
|---------------------------------------------------------------------------------------|-----------------------------------------------------------------------------------|-----------------------------------------|----------------------------------------------------|------------------------------|
| Enrollees with Mental Health Conditions with a Co-Occurring Substance Use Disorder    | All Non-Mental Health and Non-Substance Use Disorder Care                         | 11,426                                  | 126.83                                             | (-183.87 to 437.53)          |
|                                                                                       | Non-Mental Health and Non-Substance Use Disorder Inpatient Hospitalizations       | 4,258                                   | 163.18                                             | (-85.21 to 411.57)           |
|                                                                                       | Non-Mental Health and Non-Substance Use Disorder Emergency Department Visits      | 1,065                                   | 14.25                                              | (-27.64 to 56.14)            |
|                                                                                       | Non-Mental Health and Non-Substance Use Disorder Evaluation and Management Visits | 831                                     | -38.84***                                          | (-58.26 to -19.42)           |
|                                                                                       | Non-Psychotropic and Non-Substance Use Disorder Medications                       | 1,674                                   | -4.18                                              | (-92.46 to 84.09)            |
|                                                                                       | All Mental Health and Substance Use Disorder Care                                 | 3,012                                   | -39.29                                             | (-182.61 to 104.04)          |
|                                                                                       | Mental Health and Substance Use Disorder Inpatient Hospitalizations               | 811                                     | 58.56                                              | (-2.96 to 120.09)            |
|                                                                                       | Mental Health and Substance Use Disorder Emergency Department Visits              | 153                                     | 2.11                                               | (-8.94 to 13.17)             |
|                                                                                       | Mental Health and Substance Use Disorder Evaluation and Management Visits         | 156                                     | -5.67                                              | (-16.26 to 4.93)             |
|                                                                                       | Psychotropic Medications and Medications to Treat Substance Use Disorder          | 905                                     | -33.61**                                           | (-56.52 to -10.71)           |
|                                                                                       | Medications to Treat Substance Use Disorder                                       | 120                                     | 2.42                                               | (-7.46 to 12.31)             |
| Psychotropic Medications                                                              | 785                                                                               | -35.49***                               | (-56.16 to -14.82)                                 |                              |
| Enrollees with Mental Health Conditions without a Co-Occurring Substance Use Disorder | All Non-Mental Health Care                                                        | 6,908                                   | -128.11*                                           | (-231.16 to -25.06)          |
|                                                                                       | Non-Mental Health Inpatient Hospitalizations                                      | 1,716                                   | -12.46                                             | (-54.92 to 29.99)            |
|                                                                                       | Non-Mental Health Emergency Department Visits                                     | 495                                     | -7.72                                              | (-23.27 to 7.83)             |
|                                                                                       | Non-Mental Health Evaluation and Management Visits                                | 685                                     | -18.24***                                          | (-28.76 to -7.73)            |
|                                                                                       | Non-Psychotropic Medications                                                      | 1,223                                   | -17.11                                             | (-58.50 to 24.28)            |
|                                                                                       | All Mental Health Care                                                            | 821                                     | -39.62***                                          | (-59.25 to -19.98)           |
|                                                                                       | Mental Health Inpatient Hospitalizations                                          | 56                                      | -1.41                                              | (-5.72 to 2.90)              |
|                                                                                       | Mental Health Emergency Department Visits                                         | 25                                      | 2.83*                                              | (0.25 to 5.41)               |
|                                                                                       | Mental Health Evaluation and Management Visits                                    | 75                                      | -6.77**                                            | (-11.51 to -2.04)            |
| Psychotropic Medications                                                              | 469                                                                               | -22.74***                               | (-34.22 to -11.26)                                 |                              |

The exhibit displays OLS model estimates and 95% confidence intervals for a Post\*Treat interaction coefficient for all spending outcomes using main model specifications among enrollees with mental health conditions with and without a co-occurring substance use disorder. (\*\*\*) p < 0.001, \*\*p<0.01, \*p<0.05.)

#### A4.3: Coefficients for Independent Variables of Interest for Figure 2

| Spending Outcome                            | Mean in Year Prior to HDHP Offer at Treatment Firms (\$) | 3 Years Before Offer (Pre 3, \$) | 2 Years Before Offer (Pre 2, \$) | 1 Year Before Offer (Pre 1, \$) | Offer Year (Post 1, \$)    | 1 Year After Offer (Post 2, \$) | 2 Year After Offer (Post 3, \$) |
|---------------------------------------------|----------------------------------------------------------|----------------------------------|----------------------------------|---------------------------------|----------------------------|---------------------------------|---------------------------------|
| Psychotropic Medications                    | 775                                                      | 31.89 (-6.29 to 70.06)           | 10.98 (-8.00 to 29.96)           | Reference Year                  | -25.45** (-43.45 to -7.45) | -33.57* (-61.37 to -5.77)       | -33.91 (-75.79 to 7.96)         |
| Medications to Treat Substance Use Disorder | 133                                                      | -5.10 (-18.05 to 7.85)           | -3.82 (-13.13 to 5.48)           | Reference Year                  | 2.87 (-4.89 to 10.65)      | -9.26 (-23.09 to 4.58)          | -4.85 (-23.12 to 13.42)         |

The exhibit displays OLS model estimates and 95% confidence intervals for spending on mental health and substance use disorder medications using an event study model among the sample of enrollees with mental health conditions and a co-occurring substance use disorder. (\*\*\*) p < 0.001, \*\*p<0.01, \*p<0.05.)



#### A4.4: Coefficients for Independent Variables of Interest for Figure 4

| Outcome                                                                                                 | Units                                             | Pre-Period Mean at Treatment Firms | Change Attributable to HDHP Offer | 95% Confidence Interval |
|---------------------------------------------------------------------------------------------------------|---------------------------------------------------|------------------------------------|-----------------------------------|-------------------------|
| Psychotropic Medications Among Enrollees Without a Co-Occurring Substance Use Disorder                  | Quantity of Days' Supplied within a Year          | 191.07                             | -8.05*                            | (-14.24 to -1.87)       |
|                                                                                                         | Cost Per Quantity of Days' Supplied within a Year | 2.15                               | 0.03                              | (-0.06 to 0.11)         |
| Psychotropic Medications Among Enrollees With a Co-Occurring Substance Use Disorder                     | Quantity of Days' Supplied within a Year          | 286.55                             | -7.59*                            | (-14.77 to -0.42)       |
|                                                                                                         | Cost Per Quantity of Days' Supplied within a Year | 2.39                               | -0.04                             | (-0.11 to 0.04)         |
| Mental Health Outpatient E&M Services Among Enrollees Without a Co-Occurring Substance Use Disorder     | Quantity of Visit Days within a Year              | 0.84                               | -0.07***                          | (-0.10 to -0.03)        |
|                                                                                                         | Cost Per Quantity of Visit-Days within a Year     | 90.22                              | -0.59                             | (-1.67 to 0.50)         |
| Non-Mental Health Outpatient E&M Services Among Enrollees Without a Co-Occurring Substance Use Disorder | Quantity of Visit Days within a Year              | 5.07                               | -0.12***                          | (-0.18 to -0.06)        |
|                                                                                                         | Cost Per Quantity of Visit-Days within a Year     | 123.54                             | -0.66                             | (-1.67 to 0.35)         |

The exhibit displays OLS model estimates and 95% confidence intervals for the estimates included in Figure 4. (\*\*\*)  $p < 0.001$ , \*\* $p < 0.01$ , \* $p < 0.05$ .)

## A5: Sensitivity Analyses

### Exhibit A5.1: Sensitivity of Statistically Significant Outcomes to Treatment Firm Specifications

| Sample                                                                                | Spending Outcome                                                                  | Sample Selection Specification                          |                                 |                                  |                                 |                                 |
|---------------------------------------------------------------------------------------|-----------------------------------------------------------------------------------|---------------------------------------------------------|---------------------------------|----------------------------------|---------------------------------|---------------------------------|
|                                                                                       |                                                                                   | 5% Take-Up, 50% Firm Size Swing<br>(Main Specification) | 3% Take-Up, 50% Firm Size Swing | 20% Take-Up, 50% Firm Size Swing | 5% Take-Up, 25% Firm Size Swing | 5% Take-Up, 75% Firm Size Swing |
| Enrollees with Mental Health Conditions without a Co-Occurring Substance Use Disorder | All Non-Mental Health Care                                                        | -128.11* (-231.16 to -25.06)                            | -127.53* (-236.89 to -18.17)    | -64.10*** (-419.74 to -108.46)   | -151.08* (-271.48 to -30.68)    | -115.06* (-216.70 to -13.43)    |
|                                                                                       | Non-Mental Health Evaluation and Management Visits                                | -18.24*** (-28.76 to -7.73)                             | -18.51*** (-29.24 to -7.77)     | -27.54*** (-43.58 to -11.49)     | -17.46** (-28.74 to -6.17)      | -18.28*** (-28.28 to -8.28)     |
|                                                                                       | All Mental Health Care                                                            | -39.62*** (-59.25 to -19.98)                            | -35.68*** (-56.26 to -15.10)    | -45.64** (-73.84 to -17.43)      | -53.08*** (-77.89 to -28.26)    | -36.63*** (-56.28 to -16.98)    |
|                                                                                       | Mental Health Emergency Department Spending                                       | 2.83* (0.25 to 5.41)                                    | 2.62 (-0.05 to 5.28)            | 2.89 (-1.90 to 7.67)             | 3.00** (0.93 to 5.08)           | 2.40 (-0.08 to 4.88)            |
|                                                                                       | Mental Health Emergency Department Visits                                         | -6.77** (-11.51 to -2.04)                               | -5.99* (-11.26 to -0.73)        | -9.46*** (-14.36 to -4.56)       | -8.15** (-13.01 to -3.28)       | -6.34** (-10.99 to -1.68)       |
|                                                                                       | Psychotropic Medications                                                          | -22.74*** (-34.22 to -11.26)                            | -18.27** (-30.91 to -5.63)      | -27.61*** (-42.23 to -12.99)     | -29.53*** (-43.17 to -15.89)    | -20.26*** (-31.49 to -9.03)     |
| Enrollees with Mental Health Conditions with a Co-Occurring Substance Use Disorder    | Non-Mental Health and Non-Substance Use Disorder Evaluation and Management Visits | -38.84*** (-58.26 to -19.42)                            | -38.84*** (-58.84 to -18.84)    | -57.84*** (-84.89 to -30.79)     | -26.51* (-48.36 to -4.66)       | -32.66** (-52.16 to -13.16)     |
|                                                                                       | Psychotropic Medications and Medications to Treat Substance Use Disorder          | -33.61** (-56.52 to -10.71)                             | -28.78* (-51.59 to -5.98)       | -38.66* (-69.09 to -8.24)        | -43.79** (-70.71 to -16.87)     | -31.22** (-52.93 to -9.52)      |

Baseline specifications used a 50% threshold to identify large changes in firm size (i.e., swing size). This was varied to 25% and 75%. Baseline specifications used a 5% HDHP enrollment threshold (i.e., take-up) to identify firms that go from not offering a HDHP to offering a HDHP. This was varied to 3% and 20%. OLS model estimates and 95% confidence intervals are reported for the interaction term identifying the post period among treatment firms. (\*\*\*)  $p < 0.001$ , (\*\*)  $p < 0.01$ , (\*)  $p < 0.05$ .)

Exhibit A5.2: Sensitivity Analysis Using Enrollee Fixed Effects among enrollees without a co-occurring substance use disorder

| Outcome                              | Baseline Specification       | Enrollee Fixed Effects Estimate |
|--------------------------------------|------------------------------|---------------------------------|
| All Non-Mental Health Spending       | -127.35* (-230.13 to -24.58) | -194.54*** (-268.45 to -120.63) |
| Non-Mental Health E&M Visit Spending | -18.05*** (-28.57 to -7.54)  | -21.90*** (-27.82 to -15.97)    |
| All Mental Health Spending           | -39.59*** (-59.18 to -19.99) | -29.13*** (-36.14 to -22.12)    |
| Mental Health E&M Visit Spending     | -6.77** (-11.50 to -2.04)    | -6.01*** (-7.05 to -4.97)       |

Baseline specifications used enrollees that had been diagnosed in either the pre or post period and a statistical model that used calendar year and firm fixed effects. The enrollee fixed effect model used enrollee fixed effects in place of firm fixed effects and require that enrollees at treatment firms be included in the pre and post period in order to be estimated. Point estimates and 95% confidence intervals from OLS models are displayed (\*\*\*)  $p < 0.001$ , \*\* $p < 0.01$ , \* $p < 0.05$ ).

Exhibit A5.3: Sensitivity Analyses using various top-coding thresholds among enrollees without a co-occurring substance use disorder

| Top-code Percentile                  | 99.9th Percentile<br>(Baseline<br>Specification) | 99th Percentile                  | 95th Percentile                   | 90th Percentile                   | 75th Percentile                  |
|--------------------------------------|--------------------------------------------------|----------------------------------|-----------------------------------|-----------------------------------|----------------------------------|
| All Non-Mental Health Spending       | -127.35*<br>(-230.13 to -24.58)                  | -139.90**<br>(-229.79 to -50.01) | -136.45***<br>(-210.88 to -62.02) | -121.86***<br>(-183.58 to -60.15) | -99.65***<br>(-139.25 to -60.05) |
| Non-Mental Health E&M Visit Spending | -18.05***<br>(-28.57 to -7.54)                   | -16.98***<br>(-26.45 to -7.52)   | -17.59***<br>(-26.59 to -8.59)    | -17.86***<br>(-26.40 to -9.32)    | -17.15***<br>(-24.51 to -9.78)   |
| All Mental Health Spending           | -39.59***<br>(-59.18 to -19.99)                  | -36.45***<br>(-54.52 to -18.37)  | -31.60***<br>(-47.05 to -16.14)   | -28.92***<br>(-42.84 to -15.01)   | -22.14***<br>(-32.07 to -12.21)  |
| Mental Health E&M Visit Spending     | -6.77**<br>(-11.50 to -2.04)                     | -6.08**<br>(-10.17 to -1.99)     | -5.47**<br>(-8.90 to -2.04)       | -5.12**<br>(-8.19 to -2.04)       | -4.51***<br>(-7.05 to -1.96)     |

Baseline specifications top-coded spending outcome at the 99.9<sup>th</sup> percentile among spenders within each calendar year and within each treatment group. This top-coding threshold was varied. Point estimates and 95% confidence intervals from OLS models are displayed (\*\*\*)  $p < 0.001$ , \*\* $p < 0.01$ , \* $p < 0.05$ ).

Exhibit A5.4: Sensitivity Analyses using Alternative Substance Use Disorder Sample Criteria to Identify Enrollees with a Co-occurring Substance Use Disorder

|                                                                                                | Diagnosis Codes Only<br>(n = 598,550) | CCW Algorithms<br>(n = 524,416) |
|------------------------------------------------------------------------------------------------|---------------------------------------|---------------------------------|
| Non-Mental Health and Non-Substance Use Disorder Evaluation and Management Visit Spending (\$) | -38.84*** (-58.26 to -19.42)          | -29.00* (-51.49 to -6.50)       |
| Psychotropic Medications and Medications to Treat Substance Use Disorder Spending (\$)         | -33.61** (-56.52 to -10.71)           | -28.85* (-53.80 to -3.90)       |

Baseline specifications used a set of diagnosis codes to indicate whether an enrollee had a co-occurring substance use disorder. An alternative specification used Chronic Conditions Warehouse algorithms for Other Chronic Health, Mental Health, and Potentially Disabling Conditions (<https://www2.ccwdata.org/web/guest/condition-categories>) to indicate whether an enrollee had a co-occurring substance use disorder. If an enrollee met an Alcohol Use Disorder, Drug Use Disorder, or Opioid Use Disorder CCW flag, then the enrollee was considered to have had a co-occurring substance use disorder. Point estimates and 95% confidence intervals from OLS models are displayed (\*\*p < 0.01, \*p < 0.05).

A6: Pre-Period Trends Evaluation and Event Study Models

Exhibit A6.1: Graphical Pre-Period Trend Analysis for Statistically Significant Findings

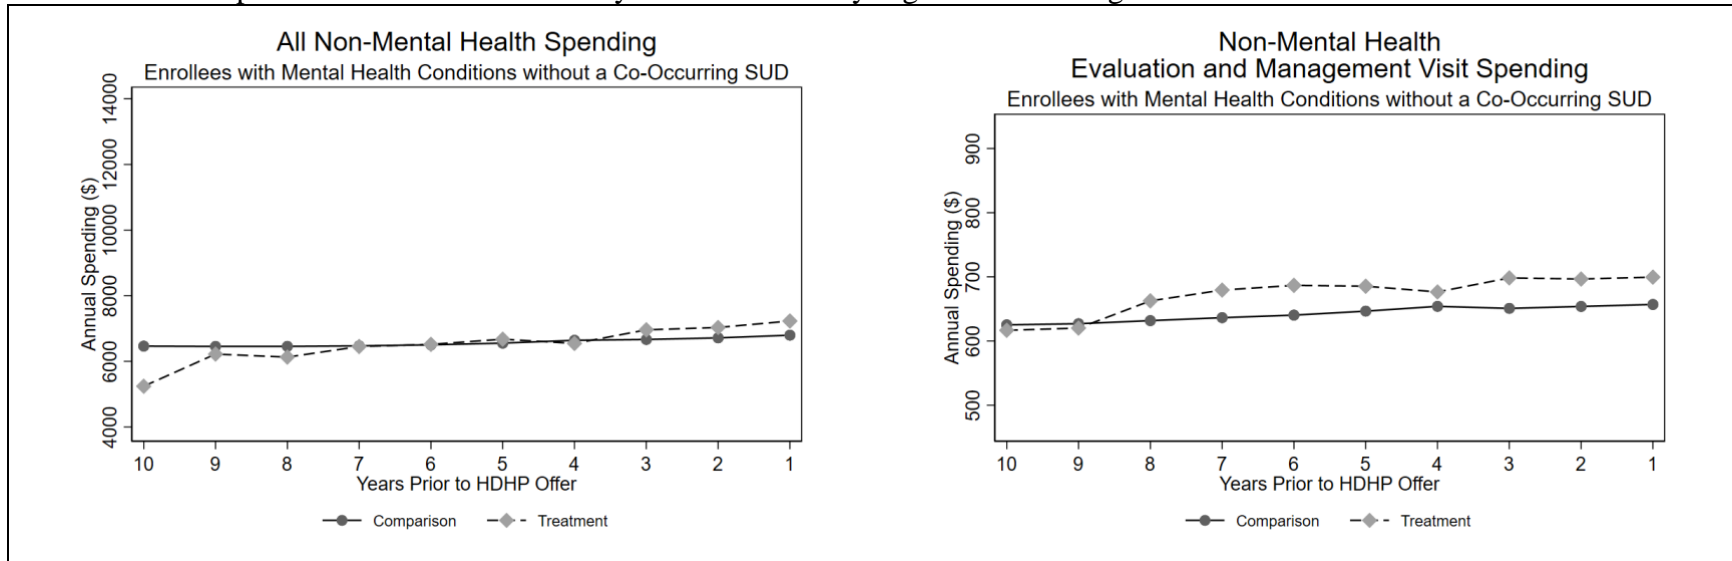

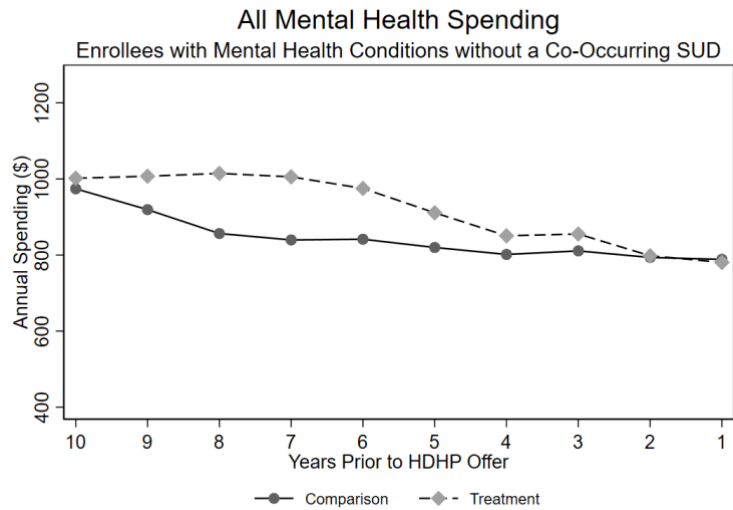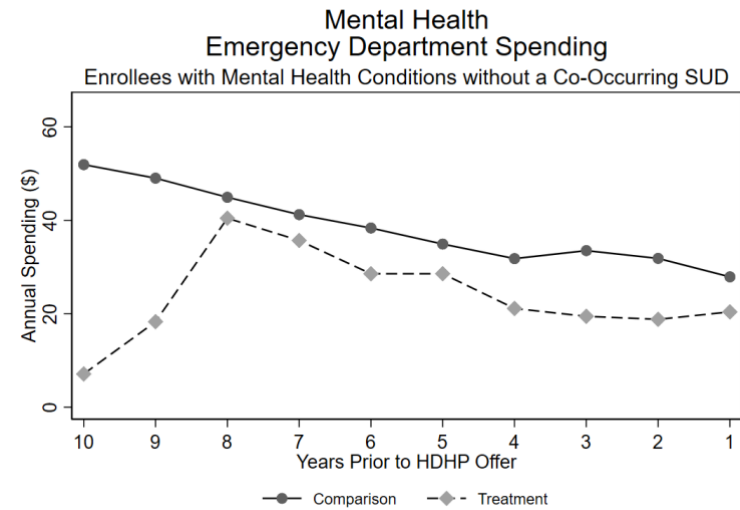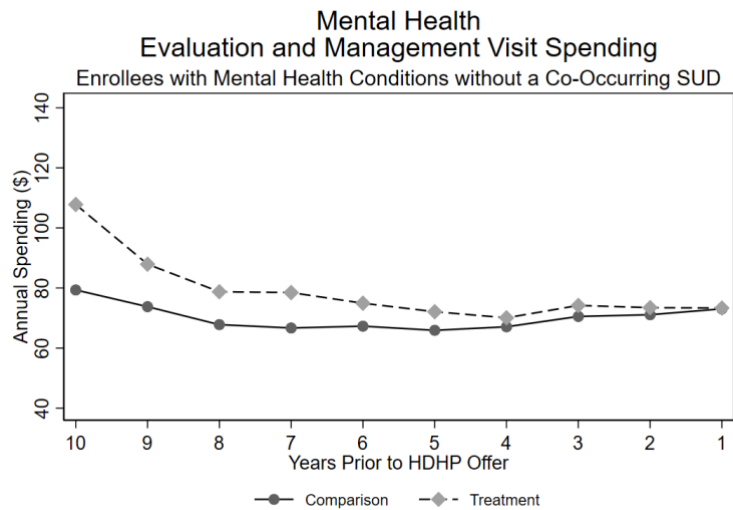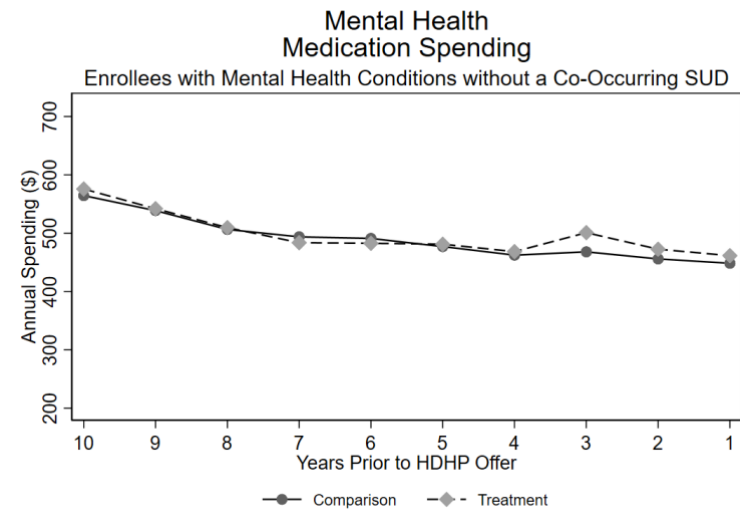

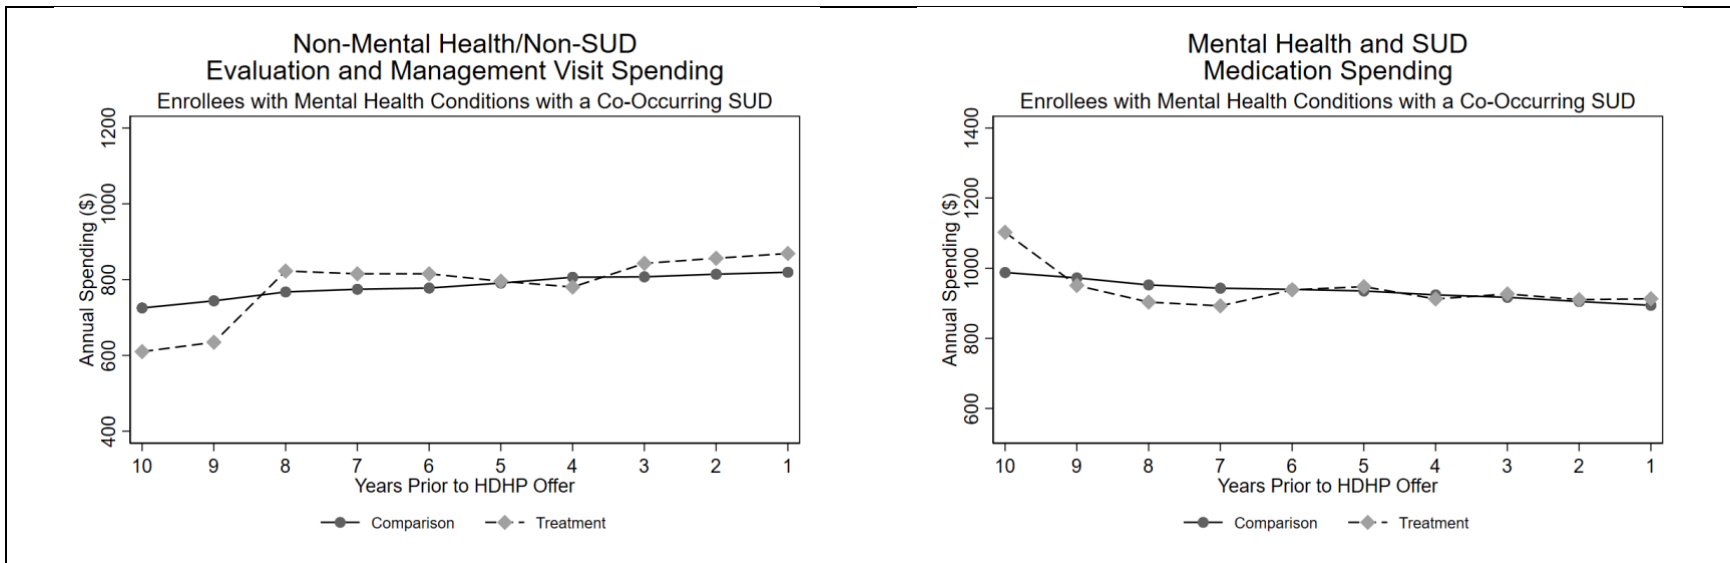

The exhibit displays pre-period means for the treatment (offered HDHP) and comparison group (not offered HDHP) for statistically significant outcomes in the main models. Comparison group means are calculated using the average of comparison group outcomes across calendar years and weighted by how often those calendar years appear in the treatment sample is that year prior to HDHP offer.

Exhibit A6.2: Full Event Study Analysis for Statistically Significant Findings

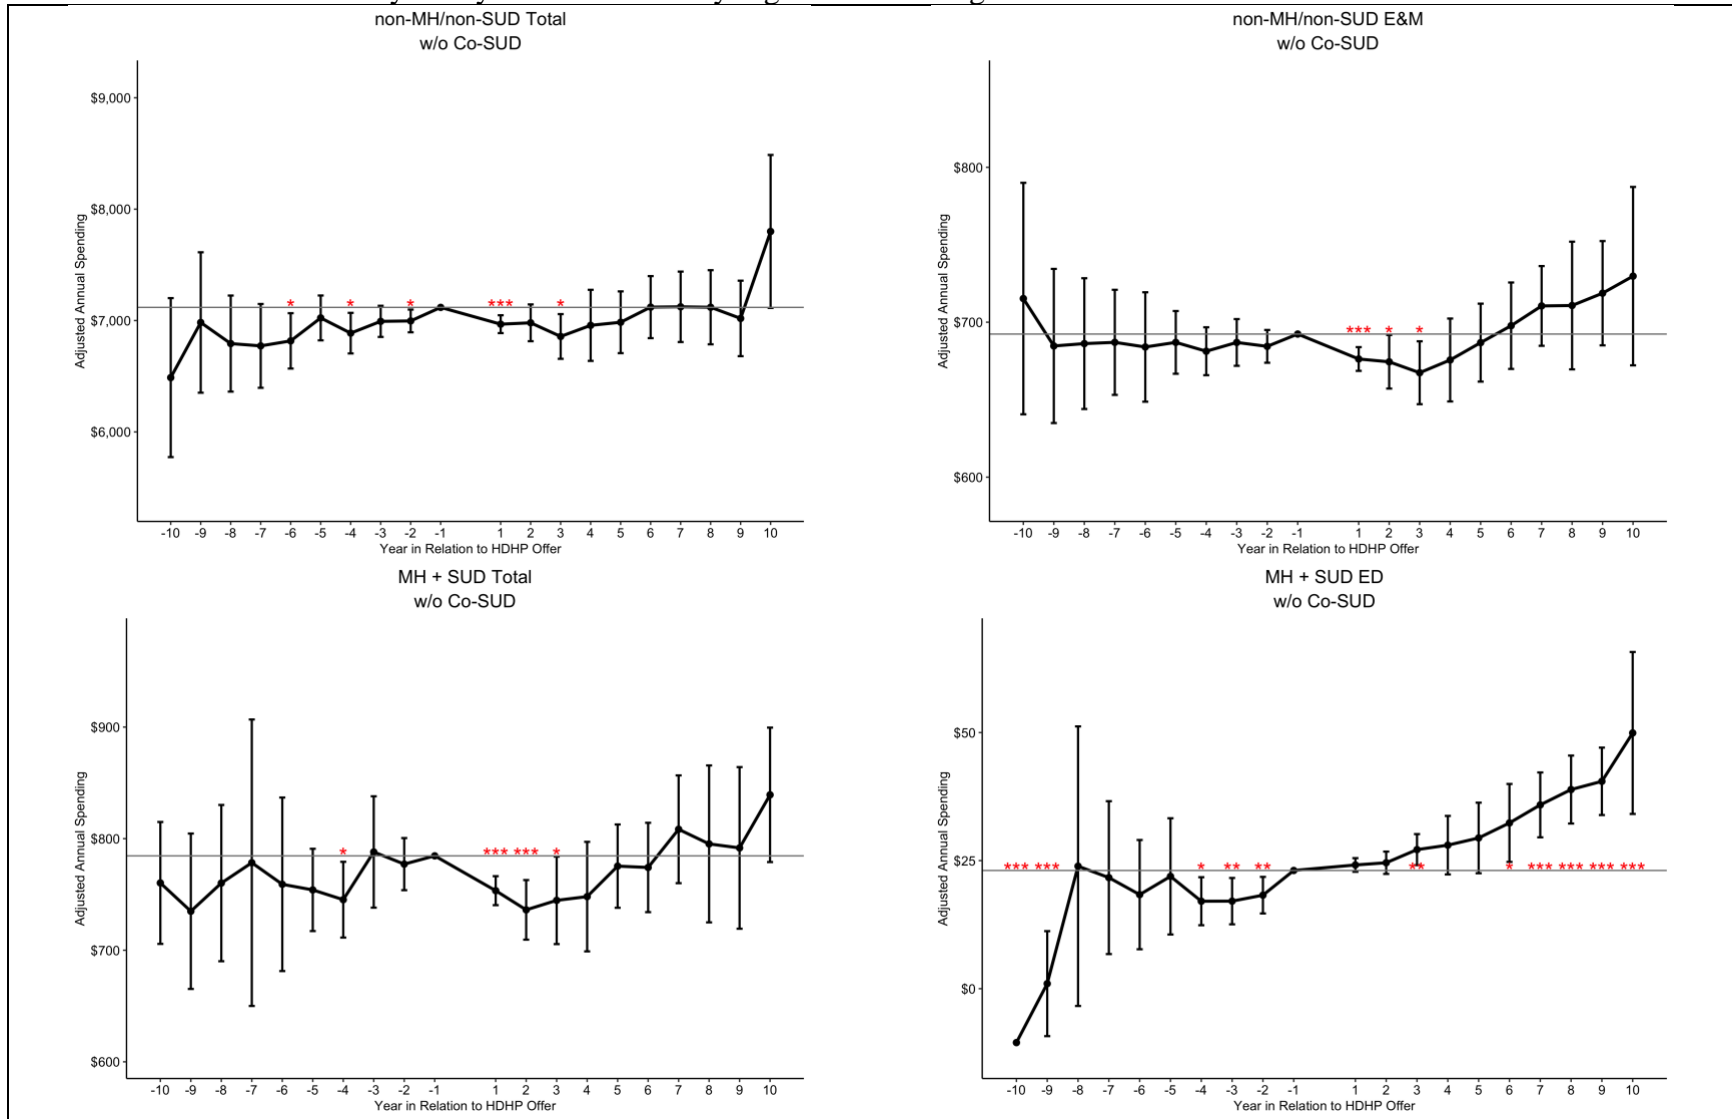



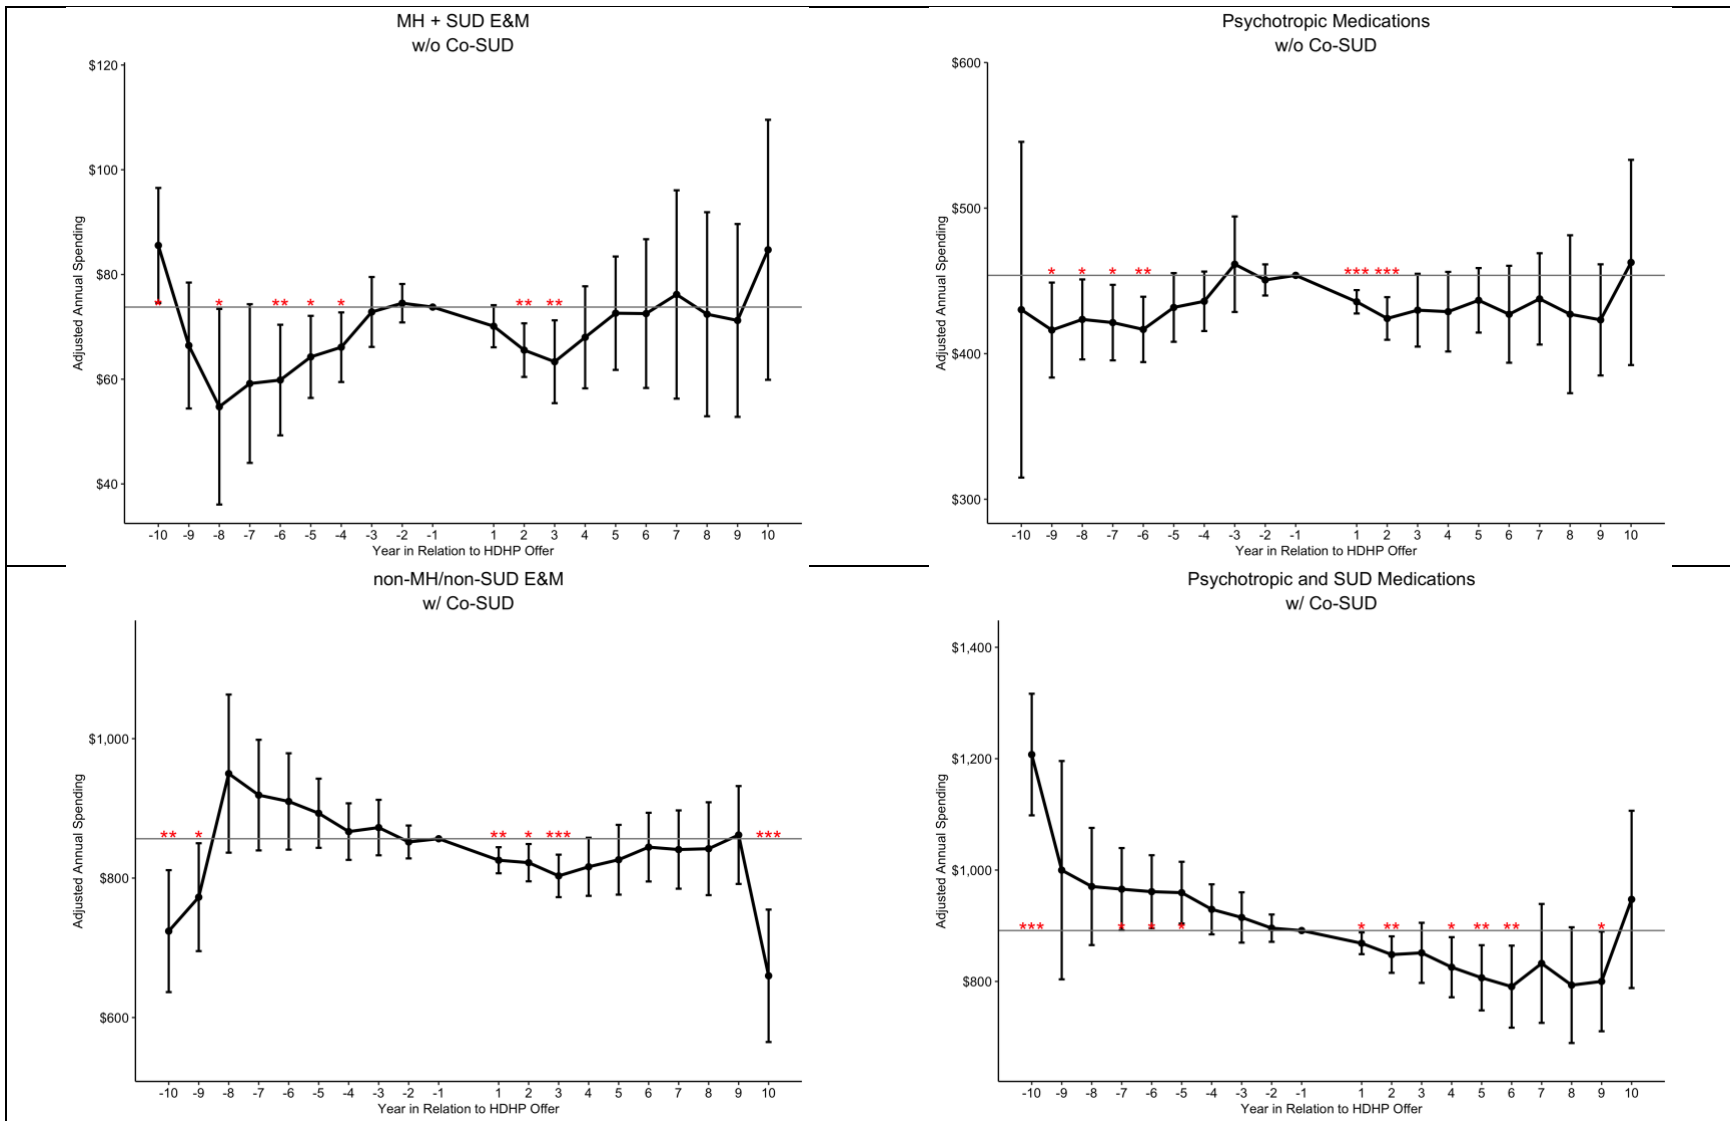

The exhibit displays a graphical representation of event study OLS model estimates and 95% confidence intervals for all statistically significant findings in main model specifications. This method of pre-trend analysis included all treatment firm data and all comparison firm data. Pre-period trend coefficients displayed are indicators for the number of years away from the HDHP offer interacted with the treatment firm indicator. The year immediately prior to the HDHP offer is left out of the model and is used as the reference year. Models include firm and calendar year fixed effects and all covariates included in main OLS models. (\*\* $p < 0.001$ , \*\* $p < 0.01$ , \* $p < 0.05$ .)

### Exhibit A6.3: Sensitivity Analysis Informed by Pre-Period Trend Analysis for Statistically Significant Findings

|                                                              | Mental Health Conditions without a Co-Occurring Substance Use Disorder |                                                            |                                 |                                             |                                                        |                                  | Mental Health Conditions with a Co-Occurring Substance Use Disorder               |                                                                       |
|--------------------------------------------------------------|------------------------------------------------------------------------|------------------------------------------------------------|---------------------------------|---------------------------------------------|--------------------------------------------------------|----------------------------------|-----------------------------------------------------------------------------------|-----------------------------------------------------------------------|
|                                                              | All Non-Mental Health Spending                                         | Non-Mental Health Evaluation and Management Visit Spending | All Mental Health Spending      | Mental Health Emergency Department Spending | Mental Health Evaluation and Management Visit Spending | Psychotropic Medication Spending | Non-Mental Health/Substance Use Disorder Evaluation and Management Visit Spending | Spending on Psychotropic Medications and Treat Substance Use Disorder |
| Effect Size in Main Model                                    | -128.11*<br>(-231.16 to -25.06)                                        | -18.24***<br>(-28.76 to -7.73)                             | -39.62***<br>(-59.25 to -19.98) | 2.83*<br>(0.25 to 5.41)                     | -6.77**<br>(-11.51 to -2.04)                           | -22.74***<br>(-34.22 to -11.26)  | -38.84***<br>(-58.26 to -19.42)                                                   | -33.61**<br>(-56.52 to -10.71)                                        |
| Limiting Treatment Firm Data to Within 4 Years of HDHP Offer | -112.9*<br>(-218.34 to -7.47)                                          | -14.90**<br>(-24.90 to -4.90)                              | -36.06***<br>(-55.11 to -17.01) | 3.97***<br>(1.75 to 6.19)                   | -6.12**<br>(-10.39 to -1.84)                           | -22.59***<br>(-33.41 to -11.78)  | -36.32***<br>(-55.43 to -17.21)                                                   | -37.16**<br>(-61.48 to -12.85)                                        |

The exhibit displays a sensitivity analysis varying the amount of treatment firm data included in the model. Baseline specification used all treatment firm data from 10 years prior to HDHP offer and 10 years after HDHP offer. In this sensitivity analysis, treatment firm data was limited to 4 years prior to HDHP offer and 4 years after HDHP offer after examining pre-period trends. OLS model estimates and 95% confidence intervals are reported for the interaction term identifying the post period among treatment firms. (\*\*\*) p < 0.001, \*\*p<0.01, \*p<0.05.)
